# Supplementary material for: Effectiveness of a group psychological intervention to reduce psychosocial distress in adolescents in Pakistan: a single-blind, cluster randomised controlled trial
Source: PubMed Central journal article supplement (PMC11254783; doi:10.1016/s2352-4642(24)00101-9), 2024-08
Supplement: mmc1.pdf [file mmc1.pdf]

# THE LANCET

## Child & Adolescent Health

### Supplementary appendix 1

This translation in Urdu was submitted by the authors and we reproduce it as supplied. It has not been peer reviewed. *The Lancet's* editorial processes have only been applied to the original in English, which should serve as reference for this manuscript.

اردو میں یہ ترجمہ مصنفین کے ذریعہ پیش کیا گیا تھا اور ہم اس کی بہو دوبارہ تخلیق کرتے ہیں۔ اس کا ہم مرتبہ ماہروں کے ذریعہ جائزہ نہیں لیا گیا ہے۔ لانسٹ کے ادارتی عمل کا اطلاق صرف انگریزی کے اصل پر ہوا ہے، جو اس نسخے کے حوالہ کے طور پر کام کرے گا

Supplement to: Hamdani SU, Huma Z-e, Malik A, et al. Effectiveness of a group psychological intervention to reduce psychosocial distress in adolescents in Pakistan: a single-blind, cluster randomised controlled trial. *Lancet Child Adolesc Health* 2024; **8**: 559–70.

## خلاصہ

### پس منظر

ترقی پذیر ممالک میں زیادہ تر نوجوانوں کے نفسیاتی و ذہنی مسائل حل نہیں ہو پاتے۔ اس کی وجہ تربیت یافتہ ماہرین نفسیات و ذہنی امراض اور تحقیق پہ مبنی ذہنی صحت کے ایسے پروگرامز جنہیں بڑے پیمانے پر لاگو کیا جاسکے کی، کمی ہے ہماری اس تحقیق کا مقصد پاکستان میں اسکول میں پڑھنے والے نوجوانوں میں نفسیاتی و ذہنی مسائل کو کم کرنے میں تربیت یافتہ معاونین (Non-specialist Facilitators) کے ذریعے گروپس میں دیئے جانے والے ایک نفسیاتی صحت کے پروگرام کی افادیت کا جائزہ لینا تھا۔

### طریقہ کار

ہم نے ایک سنگل بلائنڈڈ، کلسٹر ریئنڈمائزڈ کنٹرولڈ ٹرائل (single blinded, cluster Randomized Controlled Trial) کا تحقیقی طریقہ استعمال کیا۔ اس تحقیق میں ہم نے، راولپنڈی، پاکستان کے ایک دیہی سب ڈسٹرکٹ، گوجر خان، سے منتخب کردہ سرکاری اسکولوں کو پرمیوٹڈ بلاک ریئنڈمائزیشن (permutated block randomization) کا استعمال کرتے ہوئے تجرباتی (n=20) اور ویٹ لسٹ کنٹرول (n=20) گروپوں میں (1:1)، جنس کے لحاظ) تقسیم کیا۔

ہم نے صرف ایسے 13-15 سال کے نوجوانوں کو پروگرام میں شامل کیا جنہوں نے خود اور ان کے والدین نے اس پروگرام میں شامل ہونے کی رضامندی لکھ کر دی۔ یوتھ رپورٹڈ پیڈیاٹرک سمپٹمز چیک لسٹ (Youth Reported Pediatric Symptoms Checklist-PSC) کا استعمال کرتے ہوئے 13-15 سال کے نوجوانوں میں سماجی اور جذباتی دباؤ کی نشاندہی کی گئی۔ PSC پہ سماجی اور جذباتی دباؤ کا ٹوٹل اسکور 0-70 کے درمیان ہوتا ہے۔ صرف ایسے نوجوانوں جن کا سماجی اور جذباتی دباؤ کا ٹوٹل اسکور 28 یا اس سے زیادہ آیا انہیں اور ان کے والدین کو اس تحقیق میں شامل کیا گیا۔ تجرباتی گروپ میں شامل نوجوانوں نے تربیت یافتہ معاونین سے اسکول میں پروگرام کی سات ہفتہ وار نشستیں گروپ کی صورت میں لیں اور ان کے والدین تین دو ہفتہ وار گروپ نشستوں میں شامل ہوئے۔ اس تحقیق کا بنیادی مقصد پروگرام کے تین ماہ بعد PSC کے ٹوٹل سماجی اور جذباتی دباؤ کے اسکور میں آنے والی تبدیلی کا جائزہ لینا تھا۔ یہ ٹرائل انٹرنیشنل اسٹینڈرڈ ریئنڈمائزڈ کنٹرولڈ ٹرائل نمبر رجسٹری

( International Standard Randomised Controlled Trial Number registry ISRCTN17755448 )

کے ساتھ پیشگی رجسٹر کیا گیا تھا۔

### نتائج

نومبر 2، 2021، سے نومبر 30، 2021 کے درمیان، 40 اسکولوں میں تجرباتی گروپ میں 282 نوجوانوں اور ویٹ لسٹ کنٹرول گروپ میں 284 نوجوانوں کو شامل کیا گیا۔ تین ماہ بعد، تجرباتی گروپ میں نوجوانوں کا PSC کے ذہنی اور سماجی دباؤ کے کل اسکور کا اوسط، ویٹ لسٹ کنٹرول گروپ کے نوجوانوں کے مقابلے میں انتہائی کم تھا (ابتدائی اسکور سے پروگرام کے تین ماہ بعد کے اسکور میں فرق 3.48 [95% CI -1.66 – 5.29]، p=0.0002، ایفکٹ سائز 0.38 [95% CI -0.57 – 0.18]، adjusted mean difference [95% CI -0.55 – 0.16]، p=0.0004، ایفکٹ سائز 0.35 [95% CI -0.55 – 0.16]، difference)

کسی بھی گروپ میں پروگرام کے کوئی بھی مضر اثرات سامنے نہیں آئے۔

### تشریح

ان نتائج کی بنیاد پہ یہ کہا جاسکتا ہے کہ گروپ کی صورت میں دیا جانے والا یہ نفسیاتی و ذہنی صحت کا پروگرام اسکول جانے والے ایسے نوجوانوں جو سماجی اور جذباتی دباؤ کا شکار ہیں کے لیے مؤثر اور موزوں انتخاب ہو سکتا ہے۔
