# Supplementary material for: Effectiveness of a group psychological intervention to reduce psychosocial distress in adolescents in Pakistan: a single-blind, cluster randomised controlled trial
Source: PubMed Central journal article supplement (PMC11254783; doi:10.1016/s2352-4642(24)00101-9), 2024-08
Supplement: mmc2.pdf [file mmc2.pdf]

# THE LANCET

## Child & Adolescent Health

### Supplementary appendix 2

This appendix formed part of the original submission and has been peer reviewed. We post it as supplied by the authors.

Supplement to: Hamdani SU, Huma Z-e, Malik A, et al. Effectiveness of a group psychological intervention to reduce psychosocial distress in adolescents in Pakistan: a single-blind, cluster randomised controlled trial. *Lancet Child Adolesc Health* 2024; **8**: 559–70.

## Supplementary Appendix to the Manuscript

### Table of Contents

|                                                                                                                                                                                                                                               |    |
|-----------------------------------------------------------------------------------------------------------------------------------------------------------------------------------------------------------------------------------------------|----|
| Graph 1: Normal probability plot for conditional residuals from the mixed model analyses of primary and secondary outcomes.....                                                                                                               | 2  |
| Table S2: Secondary outcome measures and schedule of assessments .....                                                                                                                                                                        | 3  |
| Table S3.1: Summary statistics and results from mixed model analysis of primary and secondary child’s outcomes (changes from baseline) (per protocol analysis).....                                                                           | 5  |
| Table S4: Summary statistics and results from mixed model analysis of primary and secondary outcomes (changes from baseline): covariate adjusted analysis where age, cluster, PSC included as covariates (Intention to treat population)..... | 8  |
| Table S4.1: Summary statistics and results from mixed model analysis of primary and secondary outcomes (changes from baseline): covariate adjusted analysis where age, cluster, PSC included as covariates (per protocol analysis).....       | 13 |
| Table 5: Summary statistics and results from mixed model analysis of child reposted self-stigmatizing scale (Intention to treat population) .....                                                                                             | 17 |
| Table S5.1: Summary statistics and results from mixed model analysis of child reposted self-stigmatizing scale (per protocol analysis).....                                                                                                   | 18 |
| Table S6. Education/Health services utilization across two arms 3-months post intervention. ...                                                                                                                                               | 19 |
| Table S7a: Summary statistics and results from mixed model analysis of primary and secondary outcomes (changes from baseline): Sensitivity analysis (multiple imputation) – Intension to Treat (ITT) Population .....                         | 20 |
| Table S7b: Summary statistics and results from mixed model analysis of primary and secondary outcomes (changes from baseline): Sensitivity analysis (multiple imputation) – Per Protocol Analysis.....                                        | 24 |

**Graph 1: Normal probability plot for conditional residuals from the mixed model analyses of primary and secondary outcomes**

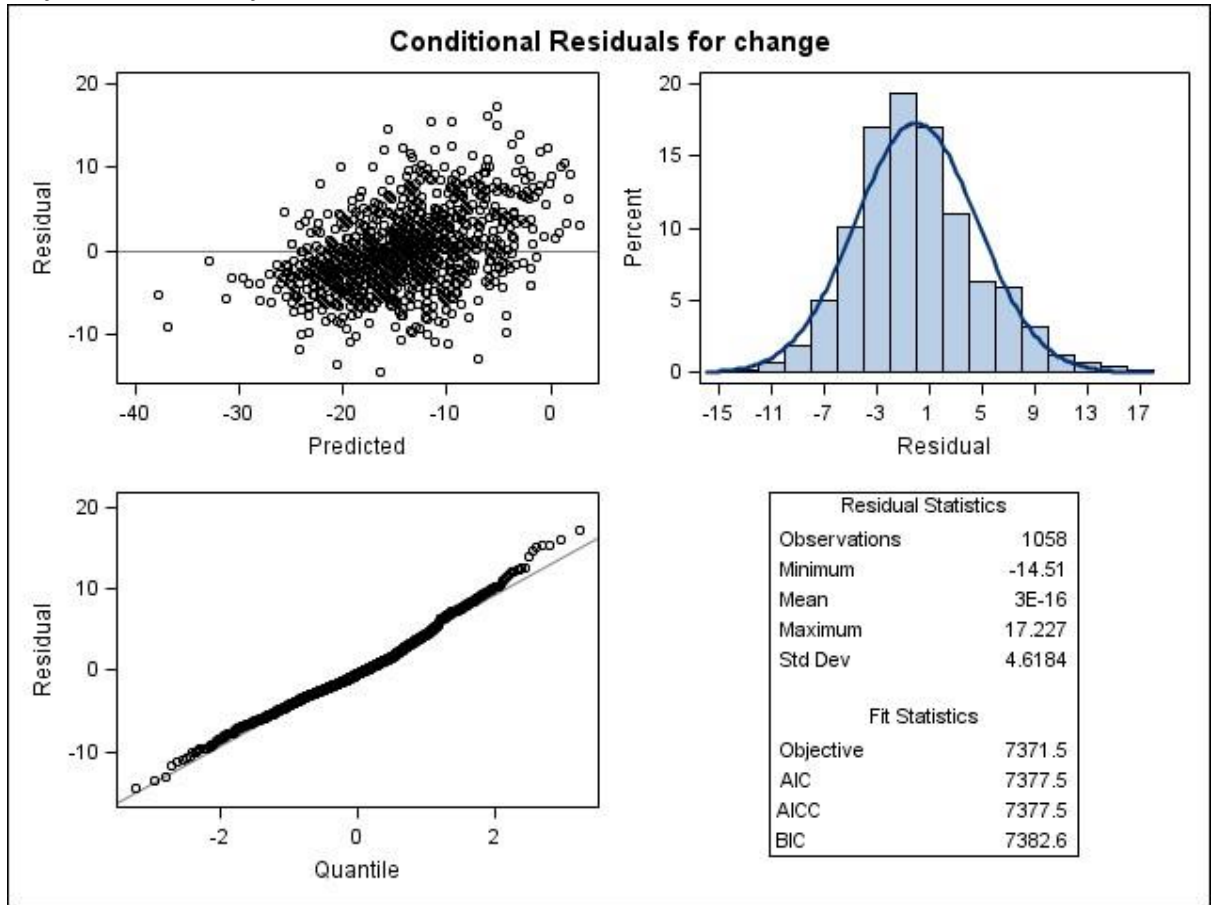

Effectiveness of a group psychological intervention to reduce psychosocial distress in adolescents in Pakistan: A single-blind, cluster Randomized Controlled Trial

**Table S2: Secondary outcome measures and schedule of assessments**

|                                                                                   | Description                                                                                                                                                                                                                                                                                                                                                         | Score                                                                                                                                                                                                                                                               | Baseline | 1-week (immediate) post-intervention follow-up | 3-month post-intervention follow-up |
|-----------------------------------------------------------------------------------|---------------------------------------------------------------------------------------------------------------------------------------------------------------------------------------------------------------------------------------------------------------------------------------------------------------------------------------------------------------------|---------------------------------------------------------------------------------------------------------------------------------------------------------------------------------------------------------------------------------------------------------------------|----------|------------------------------------------------|-------------------------------------|
| <b>Child-reported secondary outcome measures</b>                                  |                                                                                                                                                                                                                                                                                                                                                                     |                                                                                                                                                                                                                                                                     |          |                                                |                                     |
| Revised Children’s Anxiety and Depression Scale (RCADS) <sup>36</sup>             | 25 items rated on a four-point scale (0=never, 1=sometimes, 2=often, 3=always)                                                                                                                                                                                                                                                                                      | Response values for each subscale are summed to give a total raw score (range 0-75); a higher score indicates more symptoms of anxiety and depression                                                                                                               | Yes      | Yes                                            | Yes                                 |
| Patient Health Questionnaire, adolescent version (PHQ-A) <sup>37</sup>            | Nine items rated on a four-point Likert scale (0=not at all, 1=several days, 2=more than half the days, 3=nearly every day)                                                                                                                                                                                                                                         | Responses to all items are summed to give a total score (range 0–27); a higher score indicates a higher incidence of depressive symptoms                                                                                                                            | Yes      | Yes                                            | Yes                                 |
| Short Warwick–Edinburgh Mental Well-being Scale (SWEMWBS) <sup>38</sup>           | Brief questionnaire designed to measure the mental wellbeing of adolescents over the past 2 weeks; seven items rated from “none of the time” to “all of the time”                                                                                                                                                                                                   | The total score (range 7–35) is calculated by first summing the score for each of the seven items and then transforming the total raw scores to metric scores using the scale’s conversion table; higher scores indicate higher levels of positive mental wellbeing | Yes      | Yes                                            | Yes                                 |
| Somatic symptoms checklist <sup>28</sup>                                          | Ten items rated on a three-point scale (0=not true, 1=somewhat true, 2=very true or often true)                                                                                                                                                                                                                                                                     | The total score (range 0–20) is calculated by summing responses to all items; higher scores indicate frequent occurrence of somatic symptoms                                                                                                                        | Yes      | Yes                                            | Yes                                 |
| Pediatric Quality of Life (PedsQL) <sup>39</sup>                                  | 23 items rated on a four-point scale (1=no problem to 4=almost always a problem)                                                                                                                                                                                                                                                                                    | Responses are linearly transformed to a 0–100 scale; higher scores indicate better quality of life                                                                                                                                                                  | Yes      | Yes                                            | Yes                                 |
| Psychological Outcome Profiles, children’s version (PSYCHLOPS Kids) <sup>40</sup> | Assesses three domains (“problems, functioning, wellbeing) and has three questionnaire forms (pre-therapy, during therapy, and post-therapy versions); designed to be user-friendly and can be used by children as young as age 7 years                                                                                                                             | High scores (range 0–12) indicate poor functioning and wellbeing                                                                                                                                                                                                    | Yes      | Yes                                            | Yes                                 |
| Social Problem-Solving Inventory-Revised (SPSI-R) Short Form <sup>41</sup>        | Five subscales, each with five items; two subscales (positive problem orientation and negative problem orientation) evaluate functional and dysfunctional cognitive and emotional orientations towards problem-solving; the remaining three subscales (rational problem solving, impulsivity/carelessness style, and avoidance style) assess problem-solving skills | Each subscale has a total score of 0–20; higher scores on positive and rational problem-solving orientations, and lower scores on negative problem-solving orientation, impulsivity, and avoidance style, indicate good social problem-solving                      | Yes      | Yes                                            | Yes                                 |
| Perceived Emotional/Personal Support Scale (PEPSS) <sup>42</sup>                  | Designed to measure the level of emotional support adolescents receive from family, non-family adults, and friends; consists of four items; before responding to the main items, participants are first asked to list three important people for all three categories of relationships with whom they seek support                                                  | An emotional support score for each category of relationship is separately calculated by summing all items relevant to each category of relationship (range 4-12), where higher scores represent better social emotional support.                                   | Yes      | Yes                                            | Yes                                 |

Effectiveness of a group psychological intervention to reduce psychosocial distress in adolescents in Pakistan: A single-blind, cluster Randomized Controlled Trial

|                                                                                               |                                                                                                                                                                                                                                                                                                                                                                            |                                                                                                                                                                      |     |     |     |
|-----------------------------------------------------------------------------------------------|----------------------------------------------------------------------------------------------------------------------------------------------------------------------------------------------------------------------------------------------------------------------------------------------------------------------------------------------------------------------------|----------------------------------------------------------------------------------------------------------------------------------------------------------------------|-----|-----|-----|
| Personal rejection subscale of the Paediatric Self-Stigmatization Scale (PaedS) <sup>43</sup> | Five items rated on a four-point Likert scale (1=strongly disagree to 4=strongly agree), validated for its content and previously used in Pakistan <sup>49</sup>                                                                                                                                                                                                           | Higher scores (range 5=20) indicate greater stigmatization                                                                                                           | Yes | Yes | Yes |
| <b>Caregiver-reported secondary outcome measures</b>                                          |                                                                                                                                                                                                                                                                                                                                                                            |                                                                                                                                                                      |     |     |     |
| PedsQL Family Impact Module <sup>39</sup>                                                     | 36-item scale that measures quality of life across six subscales (physical functioning, emotional functioning, social functioning, cognitive functioning, communication, and worry); caregivers report on family functioning via daily activities and family relationships; items are rated on a five-point Likert scale (0=never to 4=almost always)                      | The total score is calculated by summing all 36 items and dividing by the number of items answered, higher scores indicate better functioning (less negative impact) | Yes | Yes | Yes |
| Client Service Receipt Inventory <sup>44</sup>                                                | Used to collect information on outpatient and inpatient services used by adolescents over a period of up to 9 months, including all types of health-care provider; records the number, location, and duration of services, as well as information on distance, cost, service quality, and sociodemographic characteristics                                                 | ..                                                                                                                                                                   | Yes | No  | Yes |
| <b>Outcome reported by children and caregivers</b>                                            |                                                                                                                                                                                                                                                                                                                                                                            |                                                                                                                                                                      |     |     |     |
| Alabama Parenting Questionnaire (APQ) <sup>45</sup>                                           | 42 items rated on a five-point Likert scale (1=never to 5=almost always); covers five dimensions of parenting relevant to the aetiology and treatment of adolescents' problems, including positive involvement with children, supervision and monitoring, use of positive discipline techniques, consistency in the use of such discipline, and use of corporal punishment | Subscale scores range from 0 to 15 or 0 to 50, with higher scores indicating greater strength in the relevant subscale.                                              | Yes | Yes | Yes |

**Table S3.1: Summary statistics and results from mixed model analysis of primary and secondary child's outcomes (changes from baseline) (per protocol analysis)**

| Visit                                                         | Descriptive statistics |               |                   |               | Mixed model analysis  |         |                       |
|---------------------------------------------------------------|------------------------|---------------|-------------------|---------------|-----------------------|---------|-----------------------|
|                                                               | Wait-list control      |               | EASE intervention |               | Difference (95% CI)   | p-value | Effect Size           |
|                                                               | n                      | Mean (SD)     | n                 | Mean (SD)     |                       |         |                       |
| <b>PSC total score</b>                                        |                        |               |                   |               |                       |         |                       |
| 1 week                                                        | 265                    | -12.42(8.58)  | 266               | -14.78(9.19)  | 2.65(0.85 to 4.46)    | 0.0040  | 0.29(0.09 to 0.49)    |
| 3 months                                                      | 259                    | -13.34(8.98)  | 260               | -16.39(8.67)  | 3.45(1.64 to 5.27)    | 0.0002  | 0.37(0.18 to 0.57)    |
| <b>PSC internalizing score</b>                                |                        |               |                   |               |                       |         |                       |
| 1 week                                                        | 265                    | -2.22(2.53)   | 266               | -2.57(2.50)   | 0.57(0.17 to 0.96)    | 0.0051  | 0.27(0.08 to 0.45)    |
| 3 months                                                      | 259                    | -2.53(2.62)   | 260               | -3.01(2.38)   | 0.70(0.30 to 1.10)    | 0.0007  | 0.34(0.15 to 0.54)    |
| <b>PSC externalizing score</b>                                |                        |               |                   |               |                       |         |                       |
| 1 week                                                        | 265                    | -1.36(2.50)   | 266               | -2.11(2.83)   | 0.57(0.19 to 0.95)    | 0.0037  | 0.29(0.09 to 0.48)    |
| 3 months                                                      | 259                    | -1.54(2.57)   | 260               | -2.26(2.92)   | 0.62(0.23 to 1.00)    | 0.0019  | 0.29(0.11 to 0.48)    |
| <b>PSC attention score</b>                                    |                        |               |                   |               |                       |         |                       |
| 1 week                                                        | 265                    | -2.21(2.39)   | 266               | -2.53(2.37)   | 0.42(0.05 to 0.80)    | 0.0277  | 0.21(0.02 to 0.41)    |
| 3 months                                                      | 259                    | -2.24(2.42)   | 260               | -2.78(2.34)   | 0.67(0.28 to 1.05)    | 0.0006  | 0.31(0.13 to 0.49)    |
| <b>RCADS total score</b>                                      |                        |               |                   |               |                       |         |                       |
| 1 week                                                        | 265                    | -15.01(17.26) | 266               | -17.09(17.82) | 4.31(2.09 to 6.52)    | 0.0001  | 0.34(0.17 to 0.52)    |
| 3 months                                                      | 259                    | -17.27(15.06) | 260               | -20.90(12.99) | 5.76(3.53 to 7.99)    | 0.0001  | 0.52(0.32 to 0.72)    |
| <b>RCADS anxiety score</b>                                    |                        |               |                   |               |                       |         |                       |
| 1 week                                                        | 265                    | -13.70(16.45) | 266               | -15.46(17.52) | 4.09(2.01 to 6.18)    | 0.0001  | 0.35(0.17 to 0.52)    |
| 3 months                                                      | 259                    | -15.95(14.39) | 260               | -19.08(12.66) | 5.41(3.31 to 7.52)    | 0.0001  | 0.51(0.31 to 0.71)    |
| <b>RCADS depression score</b>                                 |                        |               |                   |               |                       |         |                       |
| 1 week                                                        | 265                    | -14.22(17.70) | 266               | -16.50(16.48) | 3.30(1.11 to 5.49)    | 0.0032  | 0.27(0.09 to 0.44)    |
| 3 months                                                      | 259                    | -15.56(15.16) | 260               | -19.61(13.23) | 4.87(2.66 to 7.08)    | 0.0001  | 0.45(0.25 to 0.65)    |
| <b>Somatic symptoms</b>                                       |                        |               |                   |               |                       |         |                       |
| 1 week                                                        | 265                    | -0.12(3.74)   | 266               | -0.61(3.71)   | 0.92(0.27 to 1.57)    | 0.0056  | 0.29(0.09 to 0.49)    |
| 3 months                                                      | 259                    | -0.34(3.83)   | 260               | -1.23(3.52)   | 1.25(0.60 to 1.90)    | 0.0002  | 0.41(0.20 to 0.63)    |
| <b>**Positive problem orientation towards problem solving</b> |                        |               |                   |               |                       |         |                       |
| 1 week                                                        | 265                    | 0.35(3.97)    | 266               | 1.12(3.57)    | -0.31(-0.84 to 0.22)  | 0.2548  | -0.11(-0.29 to 0.08)  |
| 3 months                                                      | 259                    | 0.82(4.07)    | 260               | 1.28(3.78)    | 0.02(-0.52 to 0.55)   | 0.9563  | 0.01(-0.20 to 0.21)   |
| <b>**Negative problem orientation towards problem solving</b> |                        |               |                   |               |                       |         |                       |
| 1 week                                                        | 265                    | -1.49(4.59)   | 266               | -2.35(4.70)   | 1.13(0.42 to 1.84)    | 0.0018  | 0.28(0.10 to 0.45)    |
| 3 months                                                      | 259                    | -1.56(5.02)   | 260               | -2.46(4.81)   | 1.09(0.37 to 1.81)    | 0.0029  | 0.27(0.09 to 0.44)    |
| <b>**Rational orientation towards problem solving</b>         |                        |               |                   |               |                       |         |                       |
| 1 week                                                        | 265                    | 0.43(5.15)    | 266               | 1.85(4.68)    | -1.09(-1.84 to -0.34) | 0.0045  | -0.26(-0.45 to -0.08) |
| 3 months                                                      | 259                    | 1.32(5.64)    | 260               | 2.25(5.25)    | -0.61(-1.36 to 0.15)  | 0.1136  | -0.14(-0.32 to 0.03)  |
| <b>**Impulsive/Carelessness style towards problem solving</b> |                        |               |                   |               |                       |         |                       |
| 1 week                                                        | 265                    | 0.71(5.63)    | 266               | -0.82(5.47)   | 1.47(0.64 to 2.29)    | 0.0005  | 0.30(0.13 to 0.47)    |
| 3 months                                                      | 259                    | 0.63(5.76)    | 260               | -0.04(5.81)   | 0.62(-0.21 to 1.46)   | 0.1414  | 0.13(-0.04 to 0.29)   |

Effectiveness of a group psychological intervention to reduce psychosocial distress in adolescents in Pakistan: A single-blind, cluster Randomized Controlled Trial

| Visit                                       | Descriptive statistics |             |                   |              | Mixed model analysis   |         |                        |
|---------------------------------------------|------------------------|-------------|-------------------|--------------|------------------------|---------|------------------------|
|                                             | Wait-list control      |             | EASE intervention |              | Difference (95%CI)     | p-value | Effect Size            |
|                                             | n                      | Mean (SD)   | n                 | Mean (SD)    |                        |         |                        |
| <b>**Avoidance problem solving style</b>    |                        |             |                   |              |                        |         |                        |
| 1 week                                      | 265                    | -0.50(4.46) | 266               | -1.81(4.47)  | 0.74(0.15 to 1.33)     | 0.0135  | 0.21(0.04 to 0.38)     |
| 3 months                                    | 259                    | -0.64(4.67) | 260               | -2.29(4.47)  | 1.08(0.49 to 1.67)     | 0.0004  | 0.32(0.14 to 0.49)     |
| <b>PEPSQ support from family</b>            |                        |             |                   |              |                        |         |                        |
| 1 week                                      | 265                    | -1.36(6.07) | 266               | 0.50(6.93)   | -2.22(-3.48 to -0.96)  | 0.0006  | -0.20(-0.32 to -0.09)  |
| 3 months                                    | 259                    | -0.98(6.55) | 260               | 0.51(6.85)   | -1.78(-3.04 to -0.51)  | 0.0060  | -0.16(-0.27 to -0.054) |
| <b>PEPSQ support from non-family adults</b> |                        |             |                   |              |                        |         |                        |
| 1 week                                      | 265                    | -1.78(5.32) | 266               | -1.00(4.51)  | -0.45(-1.39 to 0.48)   | 0.3406  | -0.06(-0.17 to 0.06)   |
| 3 months                                    | 259                    | -1.75(5.71) | 260               | -0.96(4.95)  | -0.51(-1.45 to 0.43)   | 0.2896  | -0.06(-0.17 to 0.05)   |
| <b>PEPSQ support from friends</b>           |                        |             |                   |              |                        |         |                        |
| 1 week                                      | 265                    | -2.68(8.00) | 266               | -1.34(8.05)  | -0.91(-2.53 to 0.72)   | 0.2735  | -0.08(-0.21 to 0.06)   |
| 3 months                                    | 259                    | -2.30(9.16) | 260               | -1.13(9.29)  | -0.71(-2.35 to 0.93)   | 0.3940  | -0.06(-0.18 to 0.07)   |
| <b>PHQ-9-A score</b>                        |                        |             |                   |              |                        |         |                        |
| 1 week                                      | 265                    | -1.44(5.37) | 266               | -2.56(4.42)  | 1.71(0.96 to 2.45)     | 0.0001  | 0.39(0.22 to 0.57)     |
| 3 months                                    | 259                    | -2.28(5.48) | 260               | -3.55(4.46)  | 1.77(1.02 to 2.52)     | <0.0001 | 0.44(0.25 to 0.62)     |
| <b>SWEMWS score</b>                         |                        |             |                   |              |                        |         |                        |
| 1 week                                      | 265                    | 0.78 (4.04) | 266               | 1.79(4.29)   | -1.44 (-2.19 to -0.70) | 0.0001  | -0.38 (-0.58 to -0.19) |
| 3 months                                    | 259                    | 1.21 (4.05) | 260               | 2.22 (4.45)  | -1.41 (-2.16 to -0.66) | 0.0002  | -0.37 (-0.57 to -0.18) |
| <b>PedsQL total score</b>                   |                        |             |                   |              |                        |         |                        |
| 1 week                                      | 265                    | 4.00(13.69) | 266               | 8.97(13.79)  | -4.77(-7.19 to -2.35)  | 0.0001  | -0.36(-0.54 to -0.18)  |
| 3 months                                    | 259                    | 5.80(13.98) | 260               | 12.97(13.91) | -6.80(-9.24 to -4.37)  | 0.0001  | -0.53(-0.72 to -0.34)  |
| <b>PedsQL physical functioning</b>          |                        |             |                   |              |                        |         |                        |
| 1 week                                      | 265                    | 3.18(18.74) | 266               | 7.89(18.28)  | -3.81(-6.72 to -0.89)  | 0.0107  | -0.25(-0.43 to -0.06)  |
| 3 months                                    | 259                    | 2.93(19.98) | 260               | 10.85(18.43) | -6.57(-9.51 to -3.63)  | 0.0001  | -0.40(-0.58 to -0.22)  |
| <b>PedsQL emotional functioning</b>         |                        |             |                   |              |                        |         |                        |
| 1 week                                      | 265                    | 5.16(18.94) | 266               | 11.08(19.67) | -6.14(-9.36 to -2.91)  | 0.0002  | -0.34(-0.51 to -0.16)  |
| 3 months                                    | 259                    | 9.39(19.96) | 260               | 16.20(21.26) | -7.08(-10.33 to -3.84) | .00001  | -0.40(-0.59 to -0.22)  |
| <b>PedsQL social functioning</b>            |                        |             |                   |              |                        |         |                        |
| 1 week                                      | 265                    | 3.25(21.64) | 266               | 11.18(20.92) | -6.13(-9.33 to -2.92)  | 0.0002  | -0.36(-0.54 to -0.17)  |
| 3 months                                    | 259                    | 5.84(22.40) | 260               | 14.33(19.91) | -6.37(-9.59 to -3.14)  | 0.0001  | -0.41(-0.62 to -0.20)  |
| <b>PedsQL school functioning</b>            |                        |             |                   |              |                        |         |                        |
| 1 week                                      | 265                    | 5.46(17.82) | 266               | 7.83(17.84)  | -3.44(-6.04 to -0.84)  | 0.0096  | -0.20(-0.36 to -0.05)  |
| 3 months                                    | 259                    | 7.27(17.56) | 260               | 13.74(16.77) | -7.52(-10.15 to -4.90) | 0.0001  | -0.48(-0.64 to -0.31)  |
| <b>PedsQL psychosocial health</b>           |                        |             |                   |              |                        |         |                        |
| 1 week                                      | 265                    | 4.64(15.03) | 266               | 10.05(14.88) | -5.48(-8.08 to -2.87)  | <.0001  | -0.37(-0.55 to -0.19)  |
| 3 months                                    | 259                    | 7.50(14.91) | 260               | 14.78(14.91) | -7.26(-9.88 to -4.64)  | <.0001  | -0.54(-0.74 to -0.35)  |
| <b>PSYCHLOPS-Kids</b>                       |                        |             |                   |              |                        |         |                        |

Effectiveness of a group psychological intervention to reduce psychosocial distress in adolescents in Pakistan: A single-blind, cluster Randomized Controlled Trial

| Visit                                        | Descriptive statistics |             |                   |               | Mixed model analysis  |         |                        |
|----------------------------------------------|------------------------|-------------|-------------------|---------------|-----------------------|---------|------------------------|
|                                              | Wait-list control      |             | EASE intervention |               | Difference (95%CI)    | p-value | Effect Size            |
|                                              | n                      | Mean (SD)   | n                 | Mean (SD)     |                       |         |                        |
| 1 week                                       | 265                    | -0.84(3.76) | 266               | -2.35(4.22)   | 1. 89(1.19 to 2.60)   | <.0001  | 0.48(0.30 to 0.65)     |
| 3 months                                     | 259                    | -0.88(3.96) | 260               | -2.91(4.00)   | 2. 41(1.69 to 3.12)   | <.0001  | 0. 64(0.45 to 0.83)    |
| <b>APQ involvement</b>                       |                        |             |                   |               |                       |         |                        |
| 1 week                                       | 265                    | 3.11(12.04) | 266               | 4. 17(12.96)  | -2.50(-5.32 to 0.32)  | 0.0820  | -0.19(-0.40 to 0.02)   |
| 3 months                                     | 259                    | 7.50(13.12) | 260               | 9. 02 (14.24) | -2.78 (-5.61 to 0.05) | 0.0546  | -0.20(-0.40 to 0.00)   |
| <b>APQ positive parenting</b>                |                        |             |                   |               |                       |         |                        |
| 1 week                                       | 265                    | 0.25(4.88)  | 266               | 1. 43(4.87)   | -1.33(-2.24 to -0.41) | 0.0045  | -0.29(-0.48 to -0.09)  |
| 3 months                                     | 259                    | 0.92(4.96)  | 260               | 1. 35(5.16)   | -0.55(-1.47 to 0.37)  | 0.2383  | -0.12(-0.32 to 0.08)   |
| <b>APQ poor supervision</b>                  |                        |             |                   |               |                       |         |                        |
| 1 week                                       | 265                    | -1.73(5.49) | 266               | -1.59 (5.56)  | -0.16 (-1.11 to 0.79) | 0.7430  | -0.03(-0.22 to 0.16)   |
| 3 months                                     | 259                    | -3.07(6.09) | 260               | -3.52 (5.95)  | 0. 39 (-0.56 to 1.35) | 0.4196  | 0. 07 (-0.10 to 0.23)  |
| <b>APQ inconsistent discipline</b>           |                        |             |                   |               |                       |         |                        |
| 1 week                                       | 265                    | 0.77(4.25)  | 266               | 0.44(4.18)    | 0. 45(-0.13 to 1.03)  | 0.1266  | 0.13(-0.04 to 0.30)    |
| 3 months                                     | 259                    | 1.24(4.40)  | 260               | 0.29(4.44)    | 1. 07(0.48 to 1.65)   | 0.0004  | 0.32(0.14 to 0.49)     |
| <b>APQ corporal punishment</b>               |                        |             |                   |               |                       |         |                        |
| 1 week                                       | 265                    | -0.45(2.26) | 266               | -0.69(2.44)   | -0.03(-0.46 to 0.40)  | 0.8944  | -0.02(-0.26 to 0.22)   |
| 3 months                                     | 259                    | 1.82(3.05)  | 260               | 1. 45(3.14)   | 0. 11 (-0.32 to 0.55) | 0.6111  | 0.04(-0.12 to 0.21)    |
| <b>Caregivers' report secondary outcomes</b> |                        |             |                   |               |                       |         |                        |
| <b>PedsQL – family impact</b>                |                        |             |                   |               |                       |         |                        |
| 1 week                                       | 265                    | 4.08(12.22) | 266               | 5.55(12.50)   | -0.26(-1.31 to 0.78)  | 0.6213  | -0.04(-0.19 to 0.12)   |
| 3 months                                     | 259                    | 4.18(13.27) | 260               | 6.02(12.27)   | -0.82(-1.88 to 0.24)  | 0.1289  | -0.14(-0.33 to 0.04)   |
| <b>APQ involvement</b>                       |                        |             |                   |               |                       |         |                        |
| 1 week                                       | 265                    | 3.34(7.91)  | 266               | 6.20(6.76)    | -2.71(-4.04 to -1.38) | <.0001  | -0.37(-0.55 to -0.19)  |
| 3 months                                     | 259                    | 3.72(8.24)  | 260               | 6.06(7.15)    | -2.22(-3.50 to -0.88) | 0.0012  | -0.31(-0.50 to -0.12)  |
| <b>APQ positive parenting</b>                |                        |             |                   |               |                       |         |                        |
| 1 week                                       | 265                    | 1.35(5.54)  | 266               | 2.25(4.82)    | -1.10(-2.20 to -0.01) | 0.0488  | -0.23 (-0.47 to -0.00) |
| 3 months                                     | 259                    | 1.38(5.56)  | 260               | 1.95(4.55)    | -0.77(-1.88 to 0.33)  | 0.1686  | -0.16(-0.39 to 0.07)   |
| <b>APQ poor supervision</b>                  |                        |             |                   |               |                       |         |                        |
| 1 week                                       | 265                    | -0.10(3.78) | 266               | -2.26(4.46)   | 0.99(0.10 to 1.88)    | 0.0300  | 0.28(0.03 to 0.54)     |
| 3 months                                     | 259                    | -1.24(3.95) | 260               | -2.86(4.58)   | 0.43(-0.46 to 1.33)   | 0.3428  | 0.13(-0.13 to 0.39)    |
| <b>APQ inconsistent discipline</b>           |                        |             |                   |               |                       |         |                        |
| 1 week                                       | 265                    | 1.10(5.02)  | 266               | -7.44(128.99) | 0. 21 (-0.66 to 1.08) | 0.6382  | 0. 06 (-0.18 to 0.29)  |
| 3 months                                     | 259                    | 1.07(4.78)  | 260               | -7.25(130.55) | -0.14(-1.02 to 0.73)  | 0.7461  | -0.04 (-0.28 to 0.20)  |
| <b>APQ corporal punishment</b>               |                        |             |                   |               |                       |         |                        |
| 1 week                                       | 265                    | 0.02(2.66)  | 266               | -0.50(3.09)   | 0. 10 (-0.35 to 0.55) | 0.6649  | 0. 04(-0.14 to 0.22)   |
| 3 months                                     | 259                    | 0.11(2.77)  | 260               | -0.42(2.97)   | 0. 12 (-0.34 to 0.57) | 0.6125  | 0.05(-0.14 to 0.24)    |

PSC=Pediatric Symptom Checklist. RCADS=Revised Children Anxiety and Depression Scale. SPSS-R=Social Problem Solving inventory. PEPS=Perceived Emotional/Personal Support Scale. PHQ-9=Patient Health Questionnaire. SWEMWS=Short Warwick Edinburgh Mental Wellbeing Scale. PSYCHLOPS-Kids=Psychological Outcome Profile-Kids version. PedsQL=Pediatrics Quality of Life – Score. APQ=Alabama Parenting Questionnaire



**Table S4: Summary statistics and results from mixed model analysis of primary and secondary outcomes (changes from baseline): covariate adjusted analysis where age, cluster, PSC included as covariates (Intention to treat population)**

| Visit                                    | Descriptive statistics       |                              | Mixed model analysis |         | Effect size*        |
|------------------------------------------|------------------------------|------------------------------|----------------------|---------|---------------------|
|                                          | Wait-list control<br>(N=284) | EASE intervention<br>(N=282) | Difference (95%CI)   | p-value |                     |
|                                          | Mean (SD)                    | Mean (SD)                    |                      |         |                     |
| <b>Child reported outcomes</b>           |                              |                              |                      |         |                     |
| <b>Primary outcome</b>                   |                              |                              |                      |         |                     |
| <b>PSC total score</b>                   |                              |                              |                      |         |                     |
| Baseline                                 | 33.69(4.89)                  | 32.69(4.34)                  |                      |         |                     |
| 1 week                                   | -12.42(8.58)                 | -14.85(9.16)                 | 2.49(0.71 to 4.28)   | 0.0063  | 0.27(0.08 to 0.47)  |
| 3 months                                 | -13.34(8.98)                 | -16.38(8.65)                 | 3.26(1.46 to 5.06)   | 0.0004  | 0.35(0.16 to 0.55)  |
| <b>Child reported secondary outcomes</b> |                              |                              |                      |         |                     |
| <b>PSC internalizing score</b>           |                              |                              |                      |         |                     |
| Baseline                                 | 5.37(1.75)                   | 5.1(1.88)                    |                      |         |                     |
| 1 week                                   | -2.22(2.53)                  | -2.56(2.48)                  | 0.46(0.10 to 0.83)   | 0.0138  | 0.22(0.04 to 0.39)  |
| 3 months                                 | -2.53(2.62)                  | -3.00(2.38)                  | 0.58(0.21 to 0.96)   | 0.0022  | 0.29(0.10 to 0.47)  |
| <b>PSC externalizing score</b>           |                              |                              |                      |         |                     |
| Baseline                                 | 4.85(2.37)                   | 5.07(2.32)                   |                      |         |                     |
| 1 week                                   | -1.36(2.50)                  | -2.10(2.81)                  | 0.48(0.11 to 0.84)   | 0.0103  | 0.24(0.06 to 0.42)  |
| 3 months                                 | -1.54(2.57)                  | -2.25(2.91)                  | 0.51(0.15 to 0.88)   | 0.0061  | 0.24(0.07 to 0.42)  |
| <b>PSC attention score</b>               |                              |                              |                      |         |                     |
| Baseline                                 | 5.64(1.69)                   | 5.48(1.83)                   |                      |         |                     |
| 1 week                                   | -2.21(2.39)                  | -2.54(2.36)                  | 0.30(-0.07 to 0.67)  | 0.1092  | 0.15(-0.03 to 0.34) |
| 3 months                                 | -2.24(2.42)                  | -2.79(2.34)                  | 0.55(0.17 to 0.92)   | 0.0042  | 0.26(0.08 to 0.44)  |
| <b>RCADS total score</b>                 |                              |                              |                      |         |                     |
| Baseline                                 | 64.44(12.97)                 | 61.69(12.92)                 |                      |         |                     |
| 1 week                                   | -15.01(17.26)                | -17.09(17.77)                | 4.18(1.98 to 6.39)   | 0.0002  | 0.33(0.16 to 0.51)  |
| 3 months                                 | -17.27(15.06)                | -20.98(12.98)                | 5.72(3.49 to 7.94)   | <.0001  | 0.51(0.31 to 0.71)  |
| <b>RCADS anxiety score</b>               |                              |                              |                      |         |                     |
| Baseline                                 | 63.63(12.52)                 | 60.81(12.76)                 |                      |         |                     |
| 1 week                                   | -13.70(16.45)                | -15.48(17.50)                | 3.99(1.91 to 6.07)   | 0.0002  | 0.34(0.16 to 0.51)  |
| 3 months                                 | -15.95(14.39)                | -19.19(12.67)                | 5.40(3.30 to 7.50)   | <.0001  | 0.51(0.31 to 0.71)  |
| <b>RCADS depression score</b>            |                              |                              |                      |         |                     |
| Baseline                                 | 62(13.46)                    | 60.65(12.22)                 |                      |         |                     |
| 1 week                                   | -14.22(17.70)                | -16.45(16.37)                | 3.03(0.87 to 5.19)   | 0.0061  | 0.25(0.07 to 0.42)  |
| 3 months                                 | -15.56(15.16)                | -19.60(13.20)                | 4.62(2.43 to 6.80)   | <.0001  | 0.43(0.23 to 0.63)  |
| <b>Somatic symptoms score</b>            |                              |                              |                      |         |                     |
| Baseline                                 | 4.1(3.23)                    | 3.54(2.71)                   |                      |         |                     |
| 1 week                                   | -0.12(3.74)                  | -0.59(3.70)                  | 0.85(0.23 to 1.46)   | 0.0074  | 0.27(0.07 to 0.46)  |

Effectiveness of a group psychological intervention to reduce psychosocial distress in adolescents in Pakistan: A single-blind, cluster Randomized Controlled Trial

| Visit                                                         | Descriptive statistics       |                              | Mixed model analysis  |         | Effect size*          |
|---------------------------------------------------------------|------------------------------|------------------------------|-----------------------|---------|-----------------------|
|                                                               | Wait-list control<br>(N=284) | EASE intervention<br>(N=282) | Difference (95%CI)    | p-value |                       |
|                                                               | Mean (SD)                    | Mean (SD)                    |                       |         |                       |
| 3 months                                                      | -0.34(3.83)                  | -1.23(3.50)                  | 1.20(0.58 to 1.82)    | 0.0002  | 0.40(0.19 to 0.60)    |
| <b>**Positive orientation towards problem solving</b>         |                              |                              |                       |         |                       |
| Baseline                                                      | 7.85(3.09)                   | 7.34(2.79)                   |                       |         |                       |
| 1 week                                                        | 0.35(3.97)                   | 1.15(3.55)                   | -0.27(-0.80 to 0.25)  | 0.3085  | -0.09(-0.28 to 0.09)  |
| 3 months                                                      | 0.82(4.07)                   | 1.35(3.84)                   | -0.01(-0.54 to 0.52)  | 0.9705  | -0.00(-0.20 to 0.19)  |
| <b>**Negative orientation towards problem solving</b>         |                              |                              |                       |         |                       |
| Baseline                                                      | 8.57(4.59)                   | 8.23(3.9)                    |                       |         |                       |
| 1 week                                                        | -1.49(4.59)                  | -2.35(4.70)                  | 1.08(0.38 to 1.77)    | 0.0025  | 0.26(0.09 to 0.43)    |
| 3 months                                                      | -1.56(5.02)                  | -2.44(4.79)                  | 1.00(0.30 to 1.70)    | 0.0053  | 0.25(0.07 to 0.42)    |
| <b>**Rational orientation towards problem solving</b>         |                              |                              |                       |         |                       |
| Baseline                                                      | 7.37(4.57)                   | 6.83(3.76)                   |                       |         |                       |
| 1 week                                                        | 0.43(5.15)                   | 1.87(4.69)                   | -0.94(-1.69 to -0.20) | 0.0135  | -0.23(-0.41 to -0.05) |
| 3 months                                                      | 1.32(5.64)                   | 2.35(5.30)                   | -0.53(-1.29 to 0.22)  | 0.1645  | -0.13(-0.31 to 0.05)  |
| <b>**Impulsive/Carelessness style towards problem solving</b> |                              |                              |                       |         |                       |
| Baseline                                                      | 5.47(5.15)                   | 5.51(4.28)                   |                       |         |                       |
| 1 week                                                        | 0.71(5.63)                   | -0.77(5.44)                  | 1.23(0.44 to 2.03)    | 0.0024  | 0.25(0.09 to 0.42)    |
| 3 months                                                      | 0.63(5.76)                   | -0.02(5.80)                  | 0.40(-0.40 to 1.21)   | 0.3242  | 0.08(-0.08 to 0.24)   |
| <b>**Avoidance style towards problem solving</b>              |                              |                              |                       |         |                       |
| Baseline                                                      | 5.52(3.56)                   | 6.1(3.39)                    |                       |         |                       |
| 1 week                                                        | -0.50(4.46)                  | -1.83(4.45)                  | 0.62(0.02 to 1.21)    | 0.0429  | 0.18(0.01 to 0.35)    |
| 3 months                                                      | -0.64(4.67)                  | -2.27(4.45)                  | 0.92(0.31 to 1.52)    | 0.0030  | 0.27(0.09 to 0.45)    |
| <b>PEPS support from family</b>                               |                              |                              |                       |         |                       |
| Baseline                                                      | 15.86(11.12)                 | 18.17(10.95)                 |                       |         |                       |
| 1 week                                                        | -1.36(6.07)                  | 0.35(7.01)                   | -1.94(-3.15 to -0.73) | 0.0018  | -0.18(-0.29 to -0.07) |
| 3 months                                                      | -0.98(6.55)                  | 0.50(6.84)                   | -1.62(-2.83 to -0.40) | 0.0095  | -0.14(-0.25 to -0.03) |
| <b>PEPS support from non-family adults</b>                    |                              |                              |                       |         |                       |
| Baseline                                                      | 8.2(9.3)                     | 6.92(8.17)                   |                       |         |                       |
| 1 week                                                        | -1.78(5.32)                  | -1.05(4.56)                  | -0.30(-1.19 to 0.60)  | 0.5157  | -0.04(-0.15 to 0.07)  |
| 3 months                                                      | -1.75(5.71)                  | -1.00(4.95)                  | -0.33(-1.23 to 0.57)  | 0.4705  | -0.04(-0.15 to 0.07)  |
| <b>PEPS support from friends</b>                              |                              |                              |                       |         |                       |
| Baseline                                                      | 17.43(12.85)                 | 16.66(11.12)                 |                       |         |                       |
| 1 week                                                        | -2.68(8.00)                  | -1.38(8.04)                  | -0.82(-2.45 to 0.80)  | 0.3216  | -0.07(-0.20 to 0.07)  |
| 3 months                                                      | -2.30(9.16)                  | -1.17(9.26)                  | -0.59(-2.23 to 1.05)  | 0.4786  | -0.05(-0.18 to 0.08)  |
| <b>PHQ-9-A score</b>                                          |                              |                              |                       |         |                       |
| Baseline                                                      | 7.28(5.05)                   | 6.4(4.11)                    |                       |         |                       |
| 1 week                                                        | -1.44(5.37)                  | -2.52(4.39)                  | 1.63(0.90 to 2.36)    | <.0001  | 0.38(0.21 to 0.55)    |
| 3 months                                                      | -2.28(5.48)                  | -3.53(4.44)                  | 1.68(0.95 to 2.42)    | <.0001  | 0.42(0.23 to 0.60)    |

Effectiveness of a group psychological intervention to reduce psychosocial distress in adolescents in Pakistan: A single-blind, cluster Randomized Controlled Trial

| Visit                               | Descriptive statistics       |                              | Mixed model analysis  |         | Effect size*          |
|-------------------------------------|------------------------------|------------------------------|-----------------------|---------|-----------------------|
|                                     | Wait-list control<br>(N=284) | EASE intervention<br>(N=282) | Difference (95%CI)    | p-value |                       |
|                                     | Mean (SD)                    | Mean (SD)                    |                       |         |                       |
| <b>SWEMWS score</b>                 |                              |                              |                       |         |                       |
| Baseline                            | 18.3(3.37)                   | 18.87(3.23)                  |                       |         |                       |
| 1 week                              | 0.78(4.04)                   | 1.83(4.27)                   | -1.38(-2.11 to -0.65) | 0.0002  | -0.37(-0.56 to -0.17) |
| 3 months                            | 1.21(4.05)                   | 2.24(4.45)                   | -1.35(-2.09 to -0.62) | 0.0003  | -0.36(-0.55 to -0.16) |
| <b>PedsQL total score</b>           |                              |                              |                       |         |                       |
| Baseline                            | 75.58(13)                    | 75.25(12.16)                 |                       |         |                       |
| 1 week                              | 4.00(13.69)                  | 8.95(13.67)                  | -4.23(-6.57 to -1.89) | 0.0004  | -0.32(-0.49 to -0.14) |
| 3 months                            | 5.80(13.98)                  | 12.91(13.87)                 | -6.20(-8.56 to -3.84) | <.0001  | -0.48(-0.67 to -0.30) |
| <b>PedsQL physical functioning</b>  |                              |                              |                       |         |                       |
| Baseline                            | 82.57(14.68)                 | 81.18(14.14)                 |                       |         |                       |
| 1 week                              | 3.18(18.74)                  | 7.82(18.15)                  | -3.04(-5.83 to -0.24) | 0.0334  | -0.20(-0.38 to -0.02) |
| 3 months                            | 2.93(19.98)                  | 10.69(18.41)                 | -5.69(-8.51 to -2.87) | <.0001  | -0.35(-0.52 to -0.18) |
| <b>PedsQL emotional functioning</b> |                              |                              |                       |         |                       |
| Baseline                            | 66.12(18.7)                  | 66.84(17.27)                 |                       |         |                       |
| 1 week                              | 5.16(18.94)                  | 11.11(19.50)                 | -5.40(-8.52 to -2.28) | 0.0007  | -0.30(-0.47 to -0.13) |
| 3 months                            | 9.39(19.96)                  | 16.28(21.19)                 | -6.39(-9.54 to -3.25) | <.0001  | -0.36(-0.54 to -0.18) |
| <b>PedsQL social functioning</b>    |                              |                              |                       |         |                       |
| Baseline                            | 81.24(19.57)                 | 79.49(18.37)                 |                       |         |                       |
| 1 week                              | 3.25(21.64)                  | 11.01(20.79)                 | -5.03(-8.12 to -1.93) | 0.0015  | -0.29(-0.47 to -0.11) |
| 3 months                            | 5.84(22.40)                  | 14.19(19.85)                 | -5.26(-8.38 to -2.14) | 0.0010  | -0.34(-0.54 to -0.14) |
| <b>PedsQL school functioning</b>    |                              |                              |                       |         |                       |
| Baseline                            | 68.23(16.53)                 | 70.06(14.61)                 |                       |         |                       |
| 1 week                              | 5.46(17.82)                  | 7.98(17.80)                  | -3.28(-5.89 to -0.66) | 0.0142  | -0.19(-0.35 to -0.04) |
| 3 months                            | 7.27(17.56)                  | 13.77(16.80)                 | -7.29(-9.93 to -4.65) | <.0001  | -0.46(-0.63 to -0.30) |
| <b>PedsQL psychosocial health</b>   |                              |                              |                       |         |                       |
| Baseline                            | 71.86(14.27)                 | 72.11(12.97)                 |                       |         |                       |
| 1 week                              | 4.64(15.03)                  | 10.05(14.76)                 | -4.89(-7.41 to -2.37) | 0.0002  | -0.33(-0.50 to -0.16) |
| 3 months                            | 7.50(14.91)                  | 14.77(14.86)                 | -6.65(-9.19 to -4.10) | <.0001  | -0.50(-0.69 to -0.31) |
| <b>PSYCHLOPS-Kids</b>               |                              |                              |                       |         |                       |
| Baseline                            | 6.98(3.5)                    | 6.36(3.54)                   |                       |         |                       |
| 1 week                              | -0.84(3.76)                  | -2.34(4.20)                  | 1.73(1.04 to 2.41)    | <.0001  | 0.44(0.26 to 0.61)    |
| 3 months                            | -0.88(3.96)                  | -2.92(4.01)                  | 2.25(1.56 to 2.94)    | <.0001  | 0.60(0.41 to 0.78)    |
| <b>APQ involvement</b>              |                              |                              |                       |         |                       |
| Baseline                            | 39.73(11.96)                 | 42.35(11.88)                 |                       |         |                       |
| 1 week                              | 3.11(12.04)                  | 4.17(12.96)                  | -2.38(-5.19 to 0.42)  | 0.0954  | -0.18(-0.39 to 0.03)  |
| 3 months                            | 7.50(13.12)                  | 9.02(14.24)                  | -2.66(-5.47 to 0.16)  | 0.0644  | -0.19(-0.39 to 0.01)  |
| <b>APQ positive parenting</b>       |                              |                              |                       |         |                       |

Effectiveness of a group psychological intervention to reduce psychosocial distress in adolescents in Pakistan: A single-blind, cluster Randomized Controlled Trial

| Visit                                        | Descriptive statistics    |                           | Mixed model analysis  |         | Effect size*          |
|----------------------------------------------|---------------------------|---------------------------|-----------------------|---------|-----------------------|
|                                              | Wait-list control (N=284) | EASE intervention (N=282) | Difference (95%CI)    | p-value |                       |
|                                              | Mean (SD)                 | Mean (SD)                 |                       |         |                       |
| Baseline                                     | 18.24(4.91)               | 18.56(4.55)               |                       |         |                       |
| 1 week                                       | 0.25(4.88)                | 1.43(4.87)                | -1.25(-2.18 to -0.33) | 0.0081  | -0.27(-0.47 to -0.07) |
| 3 months                                     | 0.92(4.96)                | 1.35(5.16)                | -0.48(-1.41 to 0.45)  | 0.3139  | -0.10(-0.31 to 0.10)  |
| <b>APQ poor supervision</b>                  |                           |                           |                       |         |                       |
| Baseline                                     | 19.88(5.38)               | 20.06(5.08)               |                       |         |                       |
| 1 week                                       | -1.73(5.49)               | -1.59(5.56)               | -0.26(-1.22 to 0.69)  | 0.5918  | -0.05(-0.24 to 0.14)  |
| 3 months                                     | -3.07(6.09)               | -3.52(5.95)               | 0.29(-0.68 to 1.25)   | 0.5584  | 0.05(-0.11 to 0.21)   |
| <b>APQ inconsistent discipline</b>           |                           |                           |                       |         |                       |
| Baseline                                     | 12.88(3.35)               | 12.71(3.26)               |                       |         |                       |
| 1 week                                       | 0.77(4.25)                | 0.44(4.18)                | 0.44(-0.14 to 1.03)   | 0.1368  | 0.13(-0.04 to 0.30)   |
| 3 months                                     | 1.24(4.40)                | 0.29(4.44)                | 1.06(0.47 to 1.65)    | 0.0005  | 0.32(0.14 to 0.49)    |
| <b>APQ corporal punishment</b>               |                           |                           |                       |         |                       |
| Baseline                                     | 5.55(2.16)                | 5.77(2)                   |                       |         |                       |
| 1 week                                       | -0.45(2.26)               | -0.69(2.44)               | -0.07(-0.51 to 0.37)  | 0.7583  | -0.04(-0.28 to 0.21)  |
| 3 months                                     | 1.82(3.05)                | 1.45(3.14)                | 0.07(-0.37 to 0.52)   | 0.7528  | 0.03(-0.14 to 0.19)   |
| <b>Caregiver reported secondary outcomes</b> |                           |                           |                       |         |                       |
| <b>PedsQL – family impact</b>                |                           |                           |                       |         |                       |
| Baseline                                     | 92.54(13.93)              | 91.29(13.04)              |                       |         |                       |
| 1 week                                       | 4.08(12.22)               | 5.49(12.44)               | -0.23(-1.28 to 0.82)  | 0.6668  | 0.03(-0.19 to 0.12)   |
| 3 months                                     | 4.18(13.27)               | 6.00(12.23)               | -0.79(-1.85 to 0.28)  | 0.1475  | -0.14(-0.32 to 0.05)  |
| <b>APQ involvement</b>                       |                           |                           |                       |         |                       |
| Baseline                                     | 26.68(7.93)               | 26.15(7.23)               |                       |         |                       |
| 1 week                                       | 3.34(7.91)                | 6.19(6.74)                | -2.82(-4.14 to -1.49) | <.0001  | -0.39(-0.57 to -0.20) |
| 3 months                                     | 3.72(8.24)                | 6.02(7.13)                | -2.28(-3.61 to -0.94) | 0.0009  | -0.32(-0.50 to -0.13) |
| <b>APQ positive parenting</b>                |                           |                           |                       |         |                       |
| Baseline                                     | 19.87(4.83)               | 20.03(4.31)               |                       |         |                       |
| 1 week                                       | 1.35(5.54)                | 2.27(4.79)                | -1.20(-2.30 to -0.11) | 0.0315  | -0.26(-0.49 to -0.02) |
| 3 months                                     | 1.38(5.56)                | 1.94(4.55)                | -0.82(-1.92 to 0.28)  | 0.1443  | -0.17(-0.40 to 0.06)  |
| <b>APQ poor supervision</b>                  |                           |                           |                       |         |                       |
| Baseline                                     | 13.26(3.59)               | 14.92(4.33)               |                       |         |                       |
| 1 week                                       | -0.10(3.78)               | -2.20(4.47)               | 0.99(0.09 to 1.88)    | 0.0302  | 0.28(0.03 to 0.54)    |
| 3 months                                     | -1.24(3.95)               | -2.85(4.57)               | 0.45(-0.45 to 1.34)   | 0.3259  | 0.13(-0.13 to 0.39)   |
| <b>APQ inconsistent discipline</b>           |                           |                           |                       |         |                       |
| Baseline                                     | 13.43(3.82)               | 13.8(3.39)                |                       |         |                       |
| 1 week                                       | 1.10(5.02)                | -7.34(127.79)             | 0.20(-0.69 to 1.08)   | 0.6616  | 0.05(-0.18 to 0.29)   |
| 3 months                                     | 1.07(4.78)                | -7.14(129.80)             | -0.22(-1.11 to 0.67)  | 0.6252  | -0.06(-0.30 to 0.18)  |
| <b>APQ corporal punishment</b>               |                           |                           |                       |         |                       |

Effectiveness of a group psychological intervention to reduce psychosocial distress in adolescents in Pakistan: A single-blind, cluster Randomized Controlled Trial

| Visit    | Descriptive statistics       |                              | Mixed model analysis |         | Effect size*        |
|----------|------------------------------|------------------------------|----------------------|---------|---------------------|
|          | Wait-list control<br>(N=284) | EASE intervention<br>(N=282) | Difference (95%CI)   | p-value |                     |
|          | Mean (SD)                    | Mean (SD)                    |                      |         |                     |
| Baseline | 6.77(2.58)                   | 7.38(2.68)                   |                      |         |                     |
| 1 week   | 0.02(2.66)                   | -0.52(3.08)                  | 0.08(-0.37 to 0.53)  | 0.7327  | 0.03(-0.15 to 0.21) |
| 3 months | 0.11(2.77)                   | -0.45(2.99)                  | 0.10(-0.36 to 0.55)  | 0.6768  | 0.04(-0.15 to 0.23) |

PSC=Pediatric Symptoms Checklist. RCADS=Revised Children Anxiety and Depression Scale. \*\*= subscales of Social Problem-Solving Inventory - Revised Short Form. PEPS= Perceived Emotional/Personal Support Scale. PHQ-A=Patient Health Questionnaire – Adolescent version. SWEMWS= Short Warwick Edinburgh Mental Wellbeing Scale. PedsQL=Pediatric Quality of Life. PSYCHLOPS-Kids= Psychological Outcome Profile-Kids version. APQ= Alabama Parenting Questionnaire.

\*Effect size was calculated using the difference in least square means between intervention and control arm from mixed model divided by the pooled SD at each visit.

**Table S4.1: Summary statistics and results from mixed model analysis of primary and secondary outcomes (changes from baseline): covariate adjusted analysis where age, cluster, PSC included as covariates (per protocol analysis)**

| Visit                                                 | Descriptive statistics |                 |                   |               | Mixed model analysis  |         |                       |
|-------------------------------------------------------|------------------------|-----------------|-------------------|---------------|-----------------------|---------|-----------------------|
|                                                       | Wait-list control      |                 | EASE intervention |               | Difference (95%CI)    | p-value | Effect Size           |
|                                                       | n                      | Mean (SD)       | n                 | Mean (SD)     |                       |         |                       |
| <b>Child reported outcome measure</b>                 |                        |                 |                   |               |                       |         |                       |
| <b>PSC total score</b>                                |                        |                 |                   |               |                       |         |                       |
| 1 week                                                | 265                    | -12.42(8.58)    | 266               | -14.78(9.19)  | 2.43(0.64 to 4.22)    | 0.0078  | 0.27(0.07 to 0.46)    |
| 3 months                                              | 259                    | -13.34(8.98)    | 260               | -16.39(8.67)  | 3.26(1.46 to 5.06)    | 0.0004  | 0.35(0.16 to 0.55)    |
| <b>PSC internalizing score</b>                        |                        |                 |                   |               |                       |         |                       |
| 1 week                                                | 265                    | -2.22(2.53)     | 266               | -2.57(2.50)   | 0.45(0.08 to 0.83)    | 0.0167  | 0.21(0.04 to 0.39)    |
| 3 months                                              | 259                    | -2.53(2.62)     | 260               | -3.01(2.38)   | 0.59(0.21 to 0.96)    | 0.0022  | 0.29(0.10 to 0.47)    |
| <b>PSC externalizing score</b>                        |                        |                 |                   |               |                       |         |                       |
| 1 week                                                | 265                    | -1.36(2.50)     | 266               | -2.11(2.83)   | 0.48(0.11 to 0.84)    | 0.0106  | 0.24(0.06 to 0.42)    |
| 3 months                                              | 259                    | -1.54(2.57)     | 260               | -2.26(2.92)   | 0.52(0.16 to 0.89)    | 0.0054  | 0.25(0.07 to 0.42)    |
| <b>PSC attention score</b>                            |                        |                 |                   |               |                       |         |                       |
| 1 week                                                | 265                    | -2.21(2.39)     | 266               | -2.53(2.37)   | 0.29(-0.08 to 0.66)   | 0.1247  | 0.15(-0.04 to 0.33)   |
| 3 months                                              | 259                    | -2.24(2.42)     | 260               | -2.78(2.34)   | 0.54(0.16 to 0.91)    | 0.0050  | 0.25(0.08 to 0.43)    |
| <b>RCADS total score</b>                              |                        |                 |                   |               |                       |         |                       |
| 1 week                                                | 265                    | -15.01(17.26)   | 266               | -17.09(17.82) | 4.19(1.98 to 6.41)    | 0.0002  | 0.33(0.16 to 0.51)    |
| 3 months                                              | 259                    | -17.27(15.06)   | 260               | -20.90(12.99) | 5.67(3.44 to 7.91)    | <.0001  | 0.51(0.31 to 0.71)    |
| <b>RCADS anxiety score</b>                            |                        |                 |                   |               |                       |         |                       |
| 1 week                                                | 265                    | -13.70(16.45)   | 266               | -15.46(17.52) | 4.01(1.92 to 6.10)    | 0.0002  | 0.34(0.16 to 0.52)    |
| 3 months                                              | 259                    | -15.95(14.39)   | 260               | -19.08(12.66) | 5.36(3.25 to 7.47)    | <.0001  | 0.50(0.30 to 0.70)    |
| <b>RCADS depression score</b>                         |                        |                 |                   |               |                       |         |                       |
| 1 week                                                | 265                    | -14.22(17.70)   | 266               | -16.50(16.48) | 3.00(0.83 to 5.17)    | 0.0069  | 0.24(0.07 to 0.42)    |
| 3 months                                              | 259                    | -15.56(15.16)   | 260               | -19.61(13.23) | 4.59(2.40 to 6.78)    | <.0001  | 0.42(0.22 to 0.63)    |
| <b>Somatic symptoms</b>                               |                        |                 |                   |               |                       |         |                       |
| 1 week                                                | 265                    | -0.12(3.74)     | 266               | -0.61(3.71)   | 0.85(0.23 to 1.47)    | 0.0071  | 0.27(0.07 to 0.47)    |
| 3 months                                              | 259                    | -0.34(3.83)     | 260               | -1.23(3.52)   | 1.19(0.56 to 1.81)    | 0.0002  | 0.39(0.19 to 0.60)    |
| <b>**Positive orientation towards problem solving</b> |                        |                 |                   |               |                       |         |                       |
| 1 week                                                | 265                    | 0.35(3.97)      | 266               | 1.12(3.57)    | -0.30(-0.83 to 0.24)  | 0.2776  | -0.10(-0.29 to -0.08) |
| 3 months                                              | 259                    | 0.82(4.07)      | 260               | 1.28(3.78)    | 0.03(-0.51 to 0.57)   | 0.9221  | 0.01(-0.19 to 0.21)   |
| <b>**Negative orientation towards problem solving</b> |                        |                 |                   |               |                       |         |                       |
| 1 week                                                | 265                    | 265,-1.49(4.59) | 266               | -2.35(4.70)   | 1.06(0.36 to 1.76)    | 0.0030  | 0.26(0.09 to 0.43)    |
| 3 months                                              | 259                    | 259,-1.56(5.02) | 260               | -2.46(4.81)   | 1.02(0.31 to 1.72)    | 0.0047  | 0.25(0.08 to 0.42)    |
| <b>**Rational orientation towards problem solving</b> |                        |                 |                   |               |                       |         |                       |
| 1 week                                                | 265                    | 0.43(5.15)      | 266               | 1.85(4.68)    | -0.95(-1.71 to -0.19) | 0.0145  | -0.23(-0.41 to -0.05) |
| 3 months                                              | 259                    | 1.32(5.64)      | 260               | 2.25(5.25)    | -0.47(-1.24 to 0.29)  | 0.2238  | -0.11(-0.29 to 0.07)  |
| <b>**Impulsive/Carelessness problem solving style</b> |                        |                 |                   |               |                       |         |                       |

Effectiveness of a group psychological intervention to reduce psychosocial distress in adolescents in Pakistan: A single-blind, cluster Randomized Controlled Trial

| Visit                                    | Descriptive statistics |             |                   |              | Mixed model analysis  |         |                       |
|------------------------------------------|------------------------|-------------|-------------------|--------------|-----------------------|---------|-----------------------|
|                                          | Wait-list control      |             | EASE intervention |              | Difference (95%CI)    | p-value | Effect Size           |
|                                          | n                      | Mean (SD)   | n                 | Mean (SD)    |                       |         |                       |
| 1 week                                   | 265                    | 0.71(5.63)  | 266               | -0.82(5.47)  | 1.23(0.43 to 2.03)    | 0.0026  | 0.25(0.09 to 0.42)    |
| 3 months                                 | 259                    | 0.63(5.76)  | 260               | -0.04(5.81)  | 0.39(-0.41 to 1.20)   | 0.3371  | 0.08(-0.08 to 0.24)   |
| <b>**Avoidance problem solving style</b> |                        |             |                   |              |                       |         |                       |
| 1 week                                   | 265                    | -0.50(4.46) | 266               | -1.81(4.47)  | 0.57(-0.03 to 1.16)   | 0.0610  | 0.16(-0.01 to 0.33)   |
| 3 months                                 | 259                    | -0.64(4.67) | 260               | -2.29(4.47)  | 0.91(0.31 to 1.51)    | 0.0029  | 0.27(0.09 to 0.45)    |
| <b>PEPSQ support from family</b>         |                        |             |                   |              |                       |         |                       |
| 1 week                                   | 265                    | -1.36(6.07) | 266               | 0.50(6.93)   | -2.05(-3.24 to -0.86) | 0.0008  | -0.19(-0.30 to -0.08) |
| 3 months                                 | 259                    | -0.98(6.55) | 260               | 0.51(6.85)   | -1.61(-2.80 to -0.41) | 0.0085  | -0.14(-0.25 to -0.04) |
| <b>PEPSQ support from non-family</b>     |                        |             |                   |              |                       |         |                       |
| 1 week                                   | 265                    | -1.78(5.32) | 266               | -1.00(4.51)  | -0.32(-1.21 to 0.56)  | 0.4742  | -0.04(-0.15 to -0.07) |
| 3 months                                 | 259                    | -1.75(5.71) | 260               | -0.96(4.95)  | -0.39(-1.28 to 0.51)  | 0.3967  | -0.05(-0.15 to -0.06) |
| <b>PEPSQ support from friends</b>        |                        |             |                   |              |                       |         |                       |
| 1 week                                   | 265                    | -2.68(8.00) | 266               | -1.34(8.05)  | -0.85(-2.48 to 0.78)  | 0.3077  | -0.07(-0.21 to 0.07)  |
| 3 months                                 | 259                    | -2.30(9.16) | 260               | -1.13(9.29)  | -0.66(-2.30 to 0.98)  | 0.4315  | -0.05(-0.18 to 0.08)  |
| <b>PHQ-9-A score</b>                     |                        |             |                   |              |                       |         |                       |
| 1 week                                   | 265                    | -1.44(5.37) | 266               | -2.56(4.42)  | 1.62(0.89 to 2.35)    | <.0001  | 0.37(0.21 to 0.54)    |
| 3 months                                 | 259                    | -2.28(5.48) | 260               | -3.55(4.46)  | 1.68(0.94 to 2.42)    | <.0001  | 0.41(0.23 to 0.60)    |
| <b>SWEMWS score</b>                      |                        |             |                   |              |                       |         |                       |
| 1 week                                   | 265                    | 1.08(5.60)  | 266               | 2.38(5.78)   | -1.82(-2.80 to -0.85) | 0.0003  | -0.36(-0.55 to -0.17) |
| 3 months                                 | 259                    | 1.71(5.68)  | 260               | 2.95(5.92)   | -1.73(-2.71 to -0.75) | 0.0006  | -0.35(-0.55 to -0.16) |
| <b>PedsQL total score</b>                |                        |             |                   |              |                       |         |                       |
| 1 week                                   | 265                    | 4.00(13.69) | 266               | 8.97(13.79)  | -4.15(-6.50 to -1.80) | 0.0006  | -0.31(-0.49 to -0.13) |
| 3 months                                 | 259                    | 5.80(13.98) | 260               | 12.97(13.91) | -6.17(-8.54 to -3.80) | <.0001  | -0.48(-0.67 to -0.30) |
| <b>PedsQL physical functioning</b>       |                        |             |                   |              |                       |         |                       |
| 1 week                                   | 265                    | 3.18(18.74) | 266               | 7.89(18.28)  | -2.96(-5.78 to -0.15) | 0.0391  | -0.19(-0.37 to -0.01) |
| 3 months                                 | 259                    | 2.93(19.98) | 260               | 10.85(18.43) | -5.71(-8.55 to -2.88) | <.0001  | -0.35(-0.53 to -0.18) |
| <b>PedsQL emotional functioning</b>      |                        |             |                   |              |                       |         |                       |
| 1 week                                   | 265                    | 5.16(18.94) | 266               | 11.08(19.67) | -5.31(-8.44 to -2.18) | 0.0009  | -0.29(-0.46 to -0.12) |
| 3 months                                 | 259                    | 9.39(19.96) | 260               | 16.20(21.26) | -6.30(-9.45 to -3.14) | <.0001  | -0.36(-0.54 to -0.18) |
| <b>PedsQL social functioning</b>         |                        |             |                   |              |                       |         |                       |
| 1 week                                   | 265                    | 3.25(21.64) | 266               | 11.18(20.92) | -4.99(-8.09 to -1.88) | 0.0017  | -0.29(-0.47 to -0.11) |
| 3 months                                 | 259                    | 5.84(22.40) | 260               | 14.33(19.91) | -5.25(-8.38 to -2.13) | 0.0010  | -0.34(-0.54 to -0.14) |
| <b>PedsQL school functioning</b>         |                        |             |                   |              |                       |         |                       |
| 1 week                                   | 265                    | 5.46(17.82) | 266               | 7.83(17.84)  | -3.11(-5.73 to -0.49) | 0.0203  | -0.18(-0.34 to -0.03) |
| 3 months                                 | 259                    | 7.27(17.56) | 260               | 13.74(16.77) | -7.19(-9.84 to -4.55) | <.0001  | -0.46(-0.63 to -0.29) |
| <b>PedsQL psychosocial health</b>        |                        |             |                   |              |                       |         |                       |
| 1 week                                   | 265                    | 4.64(15.03) | 266               | 10.05(14.88) | -4.80(-7.33 to -2.27) | 0.0002  | -0.32(-0.50 to -0.15) |
| 3 months                                 | 259                    | 7.50(14.91) | 260               | 14.78(14.91) | -6.59(-9.14 to -4.04) | <.0001  | -0.49(-0.68 to -0.30) |

Effectiveness of a group psychological intervention to reduce psychosocial distress in adolescents in Pakistan: A single-blind, cluster Randomized Controlled Trial

| Visit                                         | Descriptive statistics |             |                   |               | Mixed model analysis  |         |                       |
|-----------------------------------------------|------------------------|-------------|-------------------|---------------|-----------------------|---------|-----------------------|
|                                               | Wait-list control      |             | EASE intervention |               | Difference (95%CI)    | p-value | Effect Size           |
|                                               | n                      | Mean (SD)   | n                 | Mean (SD)     |                       |         |                       |
| <b>PSYCHLOPS-Kid</b>                          |                        |             |                   |               |                       |         |                       |
| 1 week                                        | 265                    | -0.84(3.76) | 266               | -2.35(4.22)   | 1.72(1.03 to 2.41)    | <.0001  | 0.43(0.26 to 0.61)    |
| 3 months                                      | 259                    | -0.88(3.96) | 260               | -2.91(4.00)   | 2.24(1.54 to 2.93)    | <.0001  | 0.59(0.41 to 0.78)    |
| <b>APQ involvement</b>                        |                        |             |                   |               |                       |         |                       |
| 1 week                                        | 265                    | 3.11(12.04) | 266               | 4.24(13.02)   | -2.40(-5.21 to 0.42)  | 0.0952  | -0.18(-0.40 to 0.03)  |
| 3 months                                      | 259                    | 7.50(13.12) | 260               | 9.23(14.18)   | -2.78(-5.61 to 0.04)  | 0.0535  | -0.20(-0.39 to 0.00)  |
| <b>APQ positive parenting</b>                 |                        |             |                   |               |                       |         |                       |
| 1 week                                        | 265                    | 0.25(4.88)  | 266               | 1.44(4.89)    | -1.25(-2.17 to -0.33) | 0.0078  | -0.27(-0.47 to -0.07) |
| 3 months                                      | 259                    | 0.92(4.96)  | 260               | 1.38(5.17)    | -0.50(-1.42 to 0.43)  | 0.2923  | -0.11(-0.31 to 0.09)  |
| <b>APQ poor supervision</b>                   |                        |             |                   |               |                       |         |                       |
| 1 week                                        | 265                    | -1.73(5.49) | 266               | -1.63(5.59)   | -0.26(-1.21 to 0.70)  | 0.5966  | -0.05(-0.24 to 0.14)  |
| 3 months                                      | 259                    | -3.07(6.09) | 260               | -3.53(5.98)   | 0.27(-0.69 to 1.23)   | 0.5773  | 0.05(-0.12 to -0.21)  |
| <b>APQ inconsistent discipline</b>            |                        |             |                   |               |                       |         |                       |
| 1 week                                        | 265                    | 0.77(4.25)  | 266               | 0.44(4.21)    | 0.43(-0.15 to 1.02)   | 0.1438  | 0.13(-0.04 to 0.30)   |
| 3 months                                      | 259                    | 1.24(4.40)  | 260               | 0.29(4.44)    | 1.06(0.47 to 1.65)    | 0.0004  | 0.32(0.14 to 0.49)    |
| <b>APQ corporal punishment</b>                |                        |             |                   |               |                       |         |                       |
| 1 week                                        | 265                    | -0.45(2.26) | 266               | -0.70(2.44)   | -0.06(-0.50 to 0.38)  | 0.7900  | -0.03(-0.28 to 0.21)  |
| 3 months                                      | 259                    | 1.82(3.05)  | 260               | 1.44(3.15)    | 0.07(-0.37 to 0.52)   | 0.7428  | 0.03(-0.14 to 0.20)   |
| <b>Caregivers reported secondary outcomes</b> |                        |             |                   |               |                       |         |                       |
| <b>PedsQL – family impact</b>                 |                        |             |                   |               |                       |         |                       |
| 1 week                                        | 265                    | 4.08(12.22) | 266               | 5.55(12.50)   | -0.23(-1.29 to 0.83)  | 0.6717  | -0.03(-0.19 to 0.12)  |
| 3 months                                      | 259                    | 4.18(13.27) | 260               | 6.02(12.27)   | -0.79(-1.86 to 0.28)  | 0.1482  | -0.14(-0.32 to 0.05)  |
| <b>APQ involvement</b>                        |                        |             |                   |               |                       |         |                       |
| 1 week                                        | 265                    | 3.34(7.91)  | 266               | 6.20(6.76)    | -2.80(-4.13 to -1.46) | <.0001  | -0.38(-0.57 to -0.20) |
| 3 months                                      | 259                    | 3.72(8.24)  | 260               | 6.06(7.15)    | -2.29(-3.64 to -0.95) | 0.0009  | -0.32(-0.51 to -0.13) |
| <b>APQ positive parenting</b>                 |                        |             |                   |               |                       |         |                       |
| 1 week                                        | 265                    | 1.35(5.54)  | 266               | 2.25(4.82)    | -1.18(-2.28 to -0.08) | 0.0353  | -0.25(-0.48 to -0.02) |
| 3 months                                      | 259                    | 1.38(5.56)  | 260               | 1.95(4.55)    | -0.84(-1.95 to 0.26)  | 0.1334  | -0.18(-0.41 to 0.05)  |
| <b>APQ poor supervision</b>                   |                        |             |                   |               |                       |         |                       |
| 1 week                                        | 265                    | -0.10(3.78) | 266               | -2.26(4.46)   | 1.01(0.11 to 1.91)    | 0.0273  | 0.29(0.03 to 0.55)    |
| 3 months                                      | 259                    | -1.24(3.95) | 260               | -2.86(4.58)   | 0.45(-0.45 to 1.35)   | 0.3232  | 0.13(-0.13 to 0.39)   |
| <b>APQ inconsistent discipline</b>            |                        |             |                   |               |                       |         |                       |
| 1 week                                        | 265                    | 1.10(5.02)  | 266               | -7.44(128.99) | 0.14(-0.74 to 1.02)   | 0.7620  | 0.04(-0.20 to 0.27)   |
| 3 months                                      | 259                    | 1.07(4.78)  | 260               | -7.25(130.55) | -0.21(-1.09 to 0.68)  | 0.6452  | -0.06(-0.30 to 0.19)  |
| <b>APQ corporal punishment</b>                |                        |             |                   |               |                       |         |                       |
| 1 week                                        | 265                    | 0.02(2.66)  | 266               | -0.50(3.09)   | 0.06(-0.39 to 0.52)   | 0.7807  | 0.03(-0.16 to 0.21)   |
| 3 months                                      | 259                    | 0.11(2.77)  | 260               | -0.42(2.97)   | 0.08(-0.37 to 0.54)   | 0.7162  | 0.04(-0.16 to 0.23)   |

PSC=Pediatric Symptoms Checklist (PSC). RCADS=Revised Children Anxiety and Depression Scale. PEPS=Perceived Emotional/Personal Support Questionnaire. PHQ-A=Patient Health Questionnaire – Adolescent version. SWEMWS=Short Warwick Edinburgh Mental Wellbeing



Effectiveness of a group psychological intervention to reduce psychosocial distress in adolescents in Pakistan: A single-blind, cluster Randomized Controlled Trial

Scale. PedsQL=Pediatric Quality of Life. PSYCHLOPS-Kids=Psychological Outcome Profile-Kids version. APQ=Alabama Parenting Questionnaire

Effectiveness of a group psychological intervention to reduce psychosocial distress in adolescents in Pakistan: A single-blind, cluster Randomized Controlled Trial

**Table 5: Summary statistics and results from mixed model analysis of child reposted self-stigmatizing scale (Intention to treat population)**

| Measurement               | Visit    | Descriptive statistics<br>n, mean (SD) |                   | Unadjusted mixed model* |         | Adjusted mixed model |         |
|---------------------------|----------|----------------------------------------|-------------------|-------------------------|---------|----------------------|---------|
|                           |          | Wait list Control                      | EASE intervention | Difference<br>(95%CI)   | p-value | Difference (95%CI)   | p-value |
| Self-Stigmatization Scale | 3 months | 259,9.75(0.78)                         | 263,9.76(0.80)    | 0.00 (-0.19 to 0.19)    | 0.9741  | 0.01(-0.18 to 0.20)  | 0.8963  |

**Table S5.1: Summary statistics and results from mixed model analysis of child reposted self-stigmatizing scale (per protocol analysis)**

|                           | Wait-list control |            | EASE intervention |            | Mixed model analysis |         |
|---------------------------|-------------------|------------|-------------------|------------|----------------------|---------|
| Visit                     | n                 | Mean (SD)  | n                 | Mean (SD)  | Difference (95%CI)   | p-value |
| Self-Stigmatization Scale |                   |            |                   |            |                      |         |
| 3 months                  | 259               | 9.75(0.78) | 260               | 9.76(0.80) | 0.01(-0.19 to 0.20)  | 0.9537  |

**Table S6. Education/Health services utilization across two arms 3-months post intervention.**

| Service providers accessed                                                                                       | Wait-list Control (f) | EASE intervention (f)       |
|------------------------------------------------------------------------------------------------------------------|-----------------------|-----------------------------|
| <b>Services Utilized</b>                                                                                         | <b>85</b>             | <b>85</b>                   |
| <b>Education Services</b>                                                                                        |                       |                             |
| Home Tuition                                                                                                     | 12                    | 6                           |
| Tuition Centre                                                                                                   | 73                    | 76                          |
| Group Study                                                                                                      | 0                     | 1                           |
| <b>Health Services</b>                                                                                           |                       |                             |
| PHC                                                                                                              | 18                    | 7                           |
| Hospital (Walk-in)                                                                                               | 7                     | 11                          |
| Private Doctor                                                                                                   | 44                    | 55                          |
| Emergency                                                                                                        | 0                     | 0                           |
| Homeopath                                                                                                        | 0                     | 0                           |
| Traditional Healer                                                                                               | 4                     | 2                           |
| Child Mental Health                                                                                              | 0                     | 0                           |
| Other Services                                                                                                   | 0                     | 0                           |
| Hospital Admission                                                                                               | 0                     | 0                           |
| Medicine Use                                                                                                     | 50                    | 51                          |
| <b>Number of Health services visits</b>                                                                          |                       |                             |
| 3+ visits                                                                                                        | 5                     | 6                           |
| 3 visits                                                                                                         | 9                     | 8                           |
| 2 visits                                                                                                         | 15                    | 19                          |
| 1 visit                                                                                                          | 37                    | 38                          |
| <b>Medications</b>                                                                                               |                       |                             |
| <b>A. Anti-Medicine (n=16)</b>                                                                                   |                       |                             |
| - Anti-Depressants                                                                                               | 1                     | 0                           |
| - Anti-Infection                                                                                                 | 0                     | 1                           |
| - Anti-Fungal                                                                                                    | 0                     | 0                           |
| - Anti-Biotics                                                                                                   | 9                     | 6                           |
| - Anti-Malarial                                                                                                  | 0                     | 0                           |
| <b>B. Allergy</b>                                                                                                | 7                     | 9                           |
| <b>C. ENT</b>                                                                                                    | 8                     | 10                          |
| <b>D. Fever, Painkiller, Flu, Paracetamol</b>                                                                    | 53                    | 64                          |
| <b>E. Multi-vitamins, Vaccine</b>                                                                                | 2                     | 5                           |
| <b>F. Diarrhea</b>                                                                                               | 4                     | 2                           |
| <b>G. Others (anti- hypertensive, Ointment, deworming, Stomach, Vomit, bedwetting, pimples, thyroid related)</b> | 10                    | 15                          |
| <b>Average duration of consultation (in minutes) M(SD); min-max</b>                                              | 15.79 (±25.72); 5-180 | 11.56 (±11.97); 2-90        |
| <b>Average consultation fee paid (in PKR) M(SD); min-max</b>                                                     | 601.52(±880); 0-4000  | 1221.27 (±5905.34); 0-50000 |

PHC= Primary healthcare. M=Mean. SD= Standard Deviation. PKR= Pakistani Rupees.

**Table S7a: Summary statistics and results from mixed model analysis of primary and secondary outcomes (changes from baseline): Sensitivity analysis (multiple imputation) – Intention to Treat (ITT) Population**

|                                                |          |                        |                        | Mixed model analysis  |         |                       |
|------------------------------------------------|----------|------------------------|------------------------|-----------------------|---------|-----------------------|
|                                                | Visit    | Treatment A<br>(N=284) | Treatment B<br>(N=282) | Difference (95%CI)    | p-value | Effect Size           |
| <b>Primary outcomes</b>                        |          |                        |                        |                       |         |                       |
| PSC Full Scale Score                           | 1 week   | 284, -12.58(8.36)      | 282, -14.72(9.02)      | 2.74(0.94 to 4.55)    | 0.0029  | 0.30(0.10 to 0.50)    |
|                                                | 3 months | 284, -13.57(8.70)      | 282, -16.29(8.46)      | 3.48(1.6 to 5.29)     | 0.0002  | 0.38(0.18 to 0.58)    |
| <b>Child reported secondary outcomes</b>       |          |                        |                        |                       |         |                       |
| PSC internalizing score                        | 1 week   | 284, -2.19(2.47)       | 282, -2.55(2.45)       | 0.58(0.19 to 0.98)    | 0.0042  | 0.27(0.09 to 0.46)    |
|                                                | 3 months | 284, -2.47(2.57)       | 282, -2.95(2.33)       | 0.70(0.30 to 1.10)    | 0.0007  | 0.34(0.15 to 0.54)    |
| PSC externalizing score                        | 1 week   | 284, -1.37(2.45)       | 282, -2.10(2.77)       | 0.57(0.19 to 0.95)    | 0.0035  | 0.29(0.10 to 0.48)    |
|                                                | 3 months | 284, -1.55(2.49)       | 282, -2.30(2.87)       | 0.61(0.22 to 0.99)    | 0.0021  | 0.29(0.11 to 0.47)    |
| PSC attention score                            | 1 week   | 284, -2.21(2.34)       | 282, -2.50(2.34)       | 0.44(0.07 to 0.82)    | 0.0214  | 0.23(0.03 to 0.42)    |
|                                                | 3 months | 284, -2.25(2.36)       | 282, -2.77(2.30)       | 0.68(0.30 to 1.06)    | 0.0005  | 0.32(0.14 to 0.50)    |
| RCADS total score                              | 1 week   | 284, -15.02(16.85)     | 282, -16.69(17.74)     | 4.31(2.11 to 6.52)    | 0.0001  | 0.35(0.17 to 0.52)    |
|                                                | 3 months | 284, -17.36(14.58)     | 282, -20.50(12.94)     | 5.82(3.59 to 8.05)    | <.0001  | 0.52(0.32 to 0.72)    |
| RCADS anxiety score                            | 1 week   | 284, -13.63(16.02)     | 282, -15.08(17.43)     | 4.09(2.01 to 6.16)    | 0.0001  | 0.35(0.17 to 0.52)    |
|                                                | 3 months | 284, -16.01(13.86)     | 282, -18.75(12.60)     | 5.47(3.37 to 7.57)    | <.0001  | 0.52(0.32 to 0.71)    |
| RCADS depression score                         | 1 week   | 284, -14.24(17.39)     | 282, -16.11(16.39)     | 3.35(1.17 to 5.53)    | 0.0027  | 0.27(0.09 to 0.45)    |
|                                                | 3 months | 284, -15.76(14.97)     | 282, -19.17(13.32)     | 4.91(2.70 to 7.11)    | <.0001  | 0.45(0.25 to 0.66)    |
| Somatic symptoms score                         | 1 week   | 284, -0.09(3.67)       | 282, -0.55(3.67)       | 0.92(0.27 to 1.56)    | 0.0056  | 0.29(0.09 to 0.50)    |
|                                                | 3 months | 284, -0.40(3.72)       | 282, -1.13(3.46)       | 1.27(0.62 to 1.92)    | 0.0001  | 0.42(0.20 to 0.64)    |
| **Positive orientation towards problem solving | 1 week   | 284,0.56(1.70)         | 282,0.69(1.39)         | -0.29(-0.81 to 0.24)  | 0.2828  | -0.10(-0.28 to 0.08)  |
|                                                | 3 months | 284,0.91(2.83)         | 282,1.05(2.49)         | -0.02(-0.55 to 0.51)  | 0.9362  | -0.01(-0.21 to 0.19)  |
| **Negative orientation towards problem solving | 1 week   | 284, -1.97(1.88)       | 282, -1.68(1.90)       | 1.15(0.44 to 1.86)    | 0.0015  | 0.28(0.11 to 0.45)    |
|                                                | 3 months | 284, -1.55(5.57)       | 282, -2.32(5.15)       | 1.08(0.36 to 1.79)    | 0.0032  | 0.26(0.09 to 0.44)    |
| **Rational orientation                         | 1 week   | 284,1.13(2.07)         | 282,1.02(1.81)         | -1.09(-1.82 to -0.35) | 0.0038  | -0.26(-0.44 to -0.09) |

Effectiveness of a group psychological intervention to reduce psychosocial distress in adolescents in Pakistan: A single-blind, cluster Randomized Controlled Trial

|                                                    |          |                  |                  |                        |        |                       |
|----------------------------------------------------|----------|------------------|------------------|------------------------|--------|-----------------------|
| towards problem solving                            |          |                  |                  |                        |        |                       |
|                                                    | 3 months | 284,1.45(4.39)   | 282,1.95(4.19)   | -0.67(-1.42 to 0.07)   | 0.0764 | -0.16(-0.34 to 0.02)  |
| **Impulsive/Careless style towards problem solving | 1 week   | 284,0.06(1.98)   | 282, -0.04(1.93) | 1.47(0.65 to 2.29)     | 0.0004 | 0.30(0.13 to 0.47)    |
|                                                    | 3 months | 284,0.22(4.97)   | 282, -0.15(4.87) | 0.64(-0.19 to 1.47)    | 0.1321 | 0.13(-0.04 to 0.30)   |
| **Avoidance style towards problem solving          | 1 week   | 284, -0.76(1.82) | 282, -1.33(1.72) | 0.80(0.21 to 1.38)     | 0.0081 | 0.23(0.06 to 0.40)    |
|                                                    | 3 months | 284, -1.02(4.10) | 282, -1.99(3.49) | 1.09(0.49 to 1.68)     | 0.0004 | 0.32(0.15 to 0.50)    |
| PEPS support from family                           | 1 week   | 284, -1.24(5.92) | 282,0.32(6.89)   | -2.11(-3.39 to -0.83)  | 0.0013 | -0.19(-0.31 to -0.08) |
|                                                    | 3 months | 284, -0.87(6.34) | 282,0.35(6.69)   | -1.78(-3.07 to -0.50)  | 0.0067 | -0.16(-0.27 to -0.04) |
| PEPS support from non-family adults                | 1 week   | 284, -1.68(5.23) | 282, -0.96(4.52) | -0.43(-1.37 to 0.50)   | 0.3640 | -0.05(-0.17 to 0.06)  |
|                                                    | 3 months | 284, -1.64(5.63) | 282, -0.90(4.89) | -0.46(-1.40 to 0.49)   | 0.3405 | -0.06(-0.17 to 0.06)  |
| PEPS support from friends                          | 1 week   | 284, -2.54(7.82) | 282, -1.47(7.92) | -0.88(-2.50 to 0.74)   | 0.2852 | -0.07(-0.21 to 0.06)  |
|                                                    | 3 months | 284, -2.17(8.88) | 282, -1.32(9.06) | -0.65(-2.28 to 0.99)   | 0.4375 | -0.05(-0.18 to 0.08)  |
| PHQ-9-A score                                      | 1 week   | 284, -1.43(5.23) | 282, -2.51(4.34) | 1.71(0.97 to 2.45)     | <.0001 | 0.40(0.23 to 0.57)    |
|                                                    | 3 months | 284, -2.33(5.32) | 282, -3.46(4.37) | 1.77(1.03 to 2.52)     | <.0001 | 0.44(0.25 to 0.62)    |
| SWEMWS score                                       | 1 week   | 284,0.50(4.29)   | 282,2.07(4.58)   | -1.48(-2.22 to -0.74)  | <.0001 | -0.39(-0.59 to -0.20) |
|                                                    | 3 months | 284,1.55(1.46)   | 282,1.74(1.42)   | -1.44(-2.18 to -0.70)  | 0.0001 | -0.38(-0.58 to -0.19) |
| PedsQL total score                                 | 1 week   | 284,5.63(10.25)  | 282,7.49(10.62)  | -4.86(-7.27 to -2.45)  | <.0001 | -0.36(-0.54 to -0.18) |
|                                                    | 3 months | 284,8.03(12.50)  | 282,10.42(12.59) | -6.84(-9.26 to -4.41)  | <.0001 | -0.53(-0.72 to -0.34) |
| PedsQL physical functioning                        | 1 week   | 284,3.15(18.23)  | 282,7.96(18.14)  | -3.90(-6.80 to -0.99)  | 0.0086 | -0.25(-0.44 to -0.06) |
|                                                    | 3 months | 284,3.54(19.61)  | 282,10.58(18.31) | -6.55(-9.48 to -3.62)  | <.0001 | -0.40(-0.58 to -0.22) |
| PedsQL emotional functioning                       | 1 week   | 284,5.29(18.46)  | 282,10.92(19.26) | -6.25(-9.46 to -3.04)  | 0.0001 | -0.34(-0.52 to -0.17) |
|                                                    | 3 months | 284,9.52(19.36)  | 282,16.05(20.75) | -7.20(-10.44 to -3.96) | <.0001 | -0.41(-0.60 to -0.23) |
| PedsQL social functioning                          | 1 week   | 284,3.56(21.40)  | 282,10.62(20.55) | -6.20(-9.39 to -3.01)  | 0.0002 | -0.36(-0.55 to -0.18) |
|                                                    | 3 months | 284,6.25(22.01)  | 282,13.52(19.55) | -6.39(-9.60 to -3.17)  | 0.0001 | -0.41(-0.62 to -0.20) |
| PedsQL school functioning                          | 1 week   | 284,5.42(17.48)  | 282,8.08(17.52)  | -3.64(-6.24 to -1.05)  | 0.0060 | -0.21(-0.37 to -0.06) |
|                                                    | 3 months | 284,7.50(17.13)  | 282,13.66(16.35) | -7.64(-10.27 to -5.02) | <.0001 | -0.49(-0.65 to -0.32) |
| PedsQL psychosocial health                         | 1 week   | 284,4.87(14.76)  | 282,9.83(14.59)  | -5.58(-8.18 to -2.99)  | <.0001 | -0.38(-0.55 to -0.20) |
|                                                    | 3 months | 284,7.87(14.53)  | 282,14.49(14.49) | -7.33(-9.95 to -4.71)  | <.0001 | -0.55(-0.74 to -0.35) |

Effectiveness of a group psychological intervention to reduce psychosocial distress in adolescents in Pakistan: A single-blind, cluster Randomized Controlled Trial

|                                              |          |                  |                  |                       |        |                       |
|----------------------------------------------|----------|------------------|------------------|-----------------------|--------|-----------------------|
| PedsQL Physical Functioning Subscale Score   | 1 week   | 284,4.89(15.71)  | 282,4.98(15.18)  | 0.15(-1.40 to 1.71)   | 0.8451 | 0.02(-0.15 to 0.19)   |
|                                              | 3 months | 284,4.07(16.54)  | 282,5.45(14.84)  | -1.29(-2.86 to 0.28)  | 0.1067 | -0.15(-0.33 to 0.03)  |
| PedsQL Emotional Functioning Subscale Score  | 1 week   | 284,4.65(18.09)  | 282,8.14(18.68)  | -0.97(-3.53 to 1.59)  | 0.4564 | -0.08(-0.28 to 0.12)  |
|                                              | 3 months | 284,4.36(19.90)  | 282,8.95(17.46)  | -2.08(-4.66 to 0.51)  | 0.1147 | -0.17(-0.38 to 0.04)  |
| PedsQL Social Functioning Subscale Score     | 1 week   | 284,3.15(12.00)  | 282,3.19(11.04)  | -0.18(-1.05 to 0.68)  | 0.6766 | -0.04(-0.20 to 0.13)  |
|                                              | 3 months | 284,3.11(13.20)  | 282,3.22(12.16)  | -0.21(-1.09 to 0.67)  | 0.6323 | -0.04(-0.21 to 0.13)  |
| PSYCHLOPS-Kids                               | 1 week   | 284, -0.92(3.71) | 282, -2.33(4.16) | 1.92(1.21 to 2.62)    | <.0001 | 0.48(0.31 to 0.66)    |
|                                              | 3 months | 284, -0.96(3.86) | 282, -2.85(3.94) | 2.43(1.72 to 3.14)    | <.0001 | 0.65(0.46 to 0.83)    |
| APQ involvement                              | 1 week   | 284,4.73(12.77)  | 282,2.07(12.62)  | -2.50(-5.32 to 0.32)  | 0.0820 | -0.19(-0.41 to 0.02)  |
|                                              | 3 months | 284,9.07(12.42)  | 282,6.44(12.94)  | -2.78(-5.61 to 0.05)  | 0.0546 | -0.20(-0.40 to 0.00)  |
| APQ positive parenting                       | 1 week   | 284,0.28(4.81)   | 282,1.33(4.83)   | -1.33(-2.24 to -0.41) | 0.0045 | -0.29(-0.48 to -0.09) |
|                                              | 3 months | 284,0.92(4.85)   | 282,1.22(5.03)   | -0.55(-1.47 to 0.37)  | 0.2383 | -0.12(-0.32 to 0.08)  |
| APQ poor supervision                         | 1 week   | 284, -1.70(5.45) | 282, -1.58(5.51) | -0.16(-1.11 to 0.79)  | 0.7430 | -0.03(-0.22 to 0.16)  |
|                                              | 3 months | 284, -3.07(5.98) | 282, -3.45(5.83) | 0.39(-0.56 to 1.35)   | 0.4196 | 0.07(-0.10 to 0.23)   |
| APQ inconsistent discipline                  | 1 week   | 284,0.73(4.19)   | 282,0.45(4.14)   | 0.45(-0.13 to 1.03)   | 0.1266 | 0.13(-0.04 to 0.30)   |
|                                              | 3 months | 284,1.19(4.35)   | 282,0.34(4.32)   | 1.07(0.48 to 1.65)    | 0.0004 | 0.32(0.14 to 0.49)    |
| APQ corporal punishment                      | 1 week   | 284, -0.63(2.36) | 282, -0.74(2.44) | -0.03(-0.46 to 0.40)  | 0.8944 | -0.02(-0.26 to 0.22)  |
|                                              | 3 months | 284,1.64(3.09)   | 282,1.39(3.10)   | 0.11(-0.32 to 0.55)   | 0.6111 | 0.04(-0.12 to 0.21)   |
| <b>Caregiver reported secondary outcomes</b> |          |                  |                  |                       |        |                       |
| PedsQL – family impact                       | 1 week   | 284,3.90(13.27)  | 282,5.41(12.29)  | -0.27(-1.31 to 0.77)  | 0.6131 | -0.04(-0.19 to 0.11)  |
|                                              | 3 months | 284,4.38(13.14)  | 282,5.53(12.48)  | -0.82(-1.87 to 0.23)  | 0.1274 | -0.14(-0.33 to 0.04)  |
| APQ involvement (Caregiver)                  | 1 week   | 284,3.44(7.69)   | 282,6.15(6.66)   | -2.73(-4.05 to -1.41) | <.0001 | -0.37(-0.56 to -0.19) |
|                                              | 3 months | 284,3.79(7.99)   | 282,6.01(6.95)   | -2.20(-3.53 to -0.87) | 0.0012 | -0.31(-0.49 to -0.12) |
| APQ positive parenting (Caregiver)           | 1 week   | 284,1.32(5.41)   | 282,2.22(4.74)   | -1.13(-2.22 to -0.03) | 0.0442 | -0.24(-0.47 to -0.01) |
|                                              | 3 months | 284,1.37(5.37)   | 282,1.92(4.50)   | -0.75(-1.85 to 0.35)  | 0.1822 | -0.16(-0.39 to 0.07)  |
| APQ poor supervision (Caregiver)             | 1 week   | 284, -0.15(3.77) | 282, -2.11(4.42) | 0.96(0.08 to 1.85)    | 0.0332 | 0.28(0.02 to 0.53)    |
|                                              | 3 months | 284, -1.25(3.92) | 282, -2.68(4.49) | 0.43(-0.46 to 1.32)   | 0.3456 | 0.12(-0.13 to 0.38)   |

Effectiveness of a group psychological intervention to reduce psychosocial distress in adolescents in Pakistan: A single-blind, cluster Randomized Controlled Trial

|                                         |          |                |                    |                      |        |                      |
|-----------------------------------------|----------|----------------|--------------------|----------------------|--------|----------------------|
| APQ inconsistent discipline (Caregiver) | 1 week   | 284,1.12(4.98) | 282, -7.01(125.28) | 0.28(-0.59 to 1.15)  | 0.5335 | 0.07(-0.16 to 0.31)  |
|                                         | 3 months | 284,1.13(4.73) | 282, -6.58(125.36) | -0.15(-1.03 to 0.72) | 0.7316 | -0.04(-0.28 to 0.20) |
| APQ corporal punishment (Caregiver)     | 1 week   | 284,0.02(2.59) | 282, -0.52(3.06)   | 0.12(-0.33 to 0.56)  | 0.6096 | 0.05(-0.13 to 0.23)  |
|                                         | 3 months | 284,0.12(2.68) | 282, -0.41(2.94)   | 0.13(-0.32 to 0.58)  | 0.5665 | 0.05(-0.13 to 0.24)  |

PSC=Pediatric Symptoms Checklist (PSC). RCADS=Revised Children Anxiety and Depression Scale. \*\*= subscales of Social Problem-Solving Inventory - Revised Short Form. PEPS= Perceived Emotional/Personal Support Scale. PHQ-A=Patient Health Questionnaire – Adolescent version. SWEMWS= Short Warwick Edinburgh Mental Wellbeing Scale. PedsQL=Pediatric Quality of Life. PSYCHLOPS-Kids= Psychological Outcome Profile-Kids version. APQ=Alabama Parenting Questionnaire (APQ).



**Table S7b: Summary statistics and results from mixed model analysis of primary and secondary outcomes (changes from baseline): Sensitivity analysis (multiple imputation) – Per Protocol Analysis**

|                                                | Visit    | Treatment A<br>(N=284) | Treatment B<br>(N=282) | Mixed model<br>analysis<br>Difference (95%CI) | p-value | Effect Size           |
|------------------------------------------------|----------|------------------------|------------------------|-----------------------------------------------|---------|-----------------------|
| <b>Primary outcomes</b>                        |          |                        |                        |                                               |         |                       |
| PSC Full Scale Score                           | 1 week   | 284, -12.58(8.36)      | 274, -14.67(9.10)      | 2.65(0.85 to 4.46)                            | 0.0040  | 0.29(0.09 to 0.49)    |
|                                                | 3 months | 284, -13.57(8.70)      | 274, -16.32(8.54)      | 3.45(1.64 to 5.27)                            | 0.0002  | 0.37(0.18 to 0.57)    |
| <b>Child reported secondary outcomes</b>       |          |                        |                        |                                               |         |                       |
| PSC internalizing score                        | 1 week   | 284, -2.19(2.47)       | 274, -2.55(2.47)       | 0.57(0.17 to 0.96)                            | 0.0051  | 0.27(0.08 to 0.45)    |
|                                                | 3 months | 284, -2.47(2.57)       | 274, -2.97(2.34)       | 0.70(0.30 to 1.10)                            | 0.0007  | 0.34(0.15 to 0.54)    |
| PSC externalizing score                        | 1 week   | 284, -1.37(2.45)       | 274, -2.13(2.79)       | 0.57(0.19 to 0.95)                            | 0.0037  | 0.29(0.09 to 0.48)    |
|                                                | 3 months | 284, -1.55(2.49)       | 274, -2.34(2.89)       | 0.62(0.23 to 1.00)                            | 0.0019  | 0.29(0.11 to 0.48)    |
| PSC attention score                            | 1 week   | 284, -2.21(2.34)       | 274, -2.49(2.36)       | 0.42(0.05 to 0.80)                            | 0.0277  | 0.22(0.02 to 0.41)    |
|                                                | 3 months | 284, -2.25(2.36)       | 274, -2.77(2.32)       | 0.67(0.28 to 1.05)                            | 0.0006  | 0.31(0.13 to 0.49)    |
| RCADS total score                              | 1 week   | 284, -15.02(16.85)     | 274, -16.82(17.84)     | 4.31(2.09 to 6.52)                            | 0.0001  | 0.34(0.17 to 0.52)    |
|                                                | 3 months | 284, -17.36(14.58)     | 274, -20.53(13.02)     | 5.76(3.53 to 7.99)                            | <.0001  | 0.52(0.32 to 0.72)    |
| RCADS anxiety score                            | 1 week   | 284, -13.63(16.02)     | 274, -15.14(17.53)     | 4.09(2.01 to 6.18)                            | 0.0001  | 0.35(0.17 to 0.52)    |
|                                                | 3 months | 284, -16.01(13.86)     | 274, -18.75(12.65)     | 5.41(3.31 to 7.52)                            | <.0001  | 0.51(0.31 to 0.71)    |
| RCADS depression score                         | 1 week   | 284, -14.24(17.39)     | 274, -16.26(16.53)     | 3.30(1.11 to 5.49)                            | 0.0032  | 0.27(0.09 to 0.44)    |
|                                                | 3 months | 284, -15.76(14.97)     | 274, -19.31(13.41)     | 4.87(2.66 to 7.08)                            | <.0001  | 0.45(0.25 to 0.66)    |
| Somatic symptoms score                         | 1 week   | 284, -0.09(3.67)       | 274, -0.59(3.70)       | 0.92(0.27 to 1.57)                            | 0.0056  | 0.29(0.09 to 0.50)    |
|                                                | 3 months | 284, -0.40(3.72)       | 274, -1.15(3.49)       | 1.25(0.60 to 1.90)                            | 0.0002  | 0.41(0.20 to 0.63)    |
| **Positive orientation towards problem solving | 1 week   | 284,0.56(1.70)         | 274,0.69(1.36)         | -0.31(-0.84 to 0.22)                          | 0.2548  | -0.11(-0.29 to 0.08)  |
|                                                | 3 months | 284,0.91(2.83)         | 274,1.01(2.46)         | 0.02(-0.52 to 0.55)                           | 0.9563  | 0.01(-0.20 to 0.21)   |
| **Negative orientation towards problem solving | 1 week   | 284, -1.97(1.88)       | 274, -1.69(1.85)       | 1.13(0.42 to 1.84)                            | 0.0018  | 0.28(0.10 to 0.45)    |
|                                                | 3 months | 284, -1.55(5.57)       | 274, -2.39(5.18)       | 1.09(0.37 to 1.81)                            | 0.0029  | 0.27(0.09 to 0.44)    |
| **Rational orientation towards problem solving | 1 week   | 284,1.13(2.07)         | 274,1.04(1.79)         | -1.09(-1.84 to -0.34)                         | 0.0045  | -0.26(-0.45 to -0.08) |
|                                                | 3 months | 284,1.45(4.39)         | 274,1.86(4.19)         | -0.61(-1.36 to 0.15)                          | 0.1136  | -0.15(-0.33 to 0.03)  |

Effectiveness of a group psychological intervention to reduce psychosocial distress in adolescents in Pakistan: A single-blind, cluster Randomized Controlled Trial

|                                                    |          |                  |                  |                        |        |                       |
|----------------------------------------------------|----------|------------------|------------------|------------------------|--------|-----------------------|
| **Impulsive/Careless style towards problem solving | 1 week   | 284,0.06(1.98)   | 274, -0.04(1.89) | 1.47(0.64 to 2.29)     | 0.0005 | 0.30(0.13 to 0.47)    |
|                                                    | 3 months | 284,0.22(4.97)   | 274, -0.15(4.90) | 0.62(-0.21 to 1.46)    | 0.1414 | 0.13(-0.04 to 0.29)   |
| **Avoidance style towards problem solving          | 1 week   | 284, -0.76(1.82) | 274, -1.34(1.68) | 0.74(0.15 to 1.33)     | 0.0135 | 0.21(0.04 to 0.38)    |
|                                                    | 3 months | 284, -1.02(4.10) | 274, -2.03(3.51) | 1.08(0.49 to 1.67)     | 0.0004 | 0.32(0.14 to 0.50)    |
| PEPS support from family                           | 1 week   | 284, -1.24(5.92) | 274,0.48(6.84)   | -2.22(-3.48 to -0.96)  | 0.0006 | -0.20(-0.32 to -0.09) |
|                                                    | 3 months | 284, -0.87(6.34) | 274,0.41(6.73)   | -1.78(-3.04 to -0.51)  | 0.0060 | -0.16(-0.27 to -0.04) |
| PEPS support from non-family adults                | 1 week   | 284, -1.68(5.23) | 274, -0.95(4.47) | -0.45(-1.39 to 0.48)   | 0.3406 | -0.06(-0.17 to 0.06)  |
|                                                    | 3 months | 284, -1.64(5.63) | 274, -0.86(4.87) | -0.51(-1.45 to 0.43)   | 0.2896 | -0.06(-0.17 to 0.05)  |
| PEPS support from friends                          | 1 week   | 284, -2.54(7.82) | 274, -1.45(7.98) | -0.91(-2.53 to 0.72)   | 0.2735 | -0.08(-0.21 to 0.06)  |
|                                                    | 3 months | 284, -2.17(8.88) | 274, -1.27(9.13) | -0.71(-2.35 to 0.93)   | 0.3940 | -0.06(-0.18 to 0.07)  |
| PHQ-9-A score                                      | 1 week   | 284, -1.43(5.23) | 274, -2.55(4.38) | 1.71(0.96 to 2.45)     | <.0001 | 0.40(0.22 to 0.57)    |
|                                                    | 3 months | 284, -2.33(5.32) | 274, -3.52(4.40) | 1.77(1.02 to 2.52)     | <.0001 | 0.44(0.25 to 0.62)    |
| SWEMWS score                                       | 1 week   | 284,0.50(4.29)   | 274,2.08(4.56)   | -1.44(-2.19 to -0.70)  | 0.0001 | -0.38(-0.58 to -0.19) |
|                                                    | 3 months | 284,1.55(1.46)   | 274,1.76(1.41)   | -1.41(-2.16 to -0.66)  | 0.0002 | -0.37(-0.57 to -0.18) |
| PedsQL total score                                 | 1 week   | 284,5.63(10.25)  | 274,7.64(10.69)  | -4.77(-7.19 to -2.35)  | 0.0001 | -0.36(-0.54 to -0.18) |
|                                                    | 3 months | 284,8.03(12.50)  | 274,10.57(12.71) | -6.80(-9.24 to -4.37)  | <.0001 | -0.53(-0.72 to -0.34) |
| PedsQL physical functioning                        | 1 week   | 284,3.15(18.23)  | 274,8.02(18.35)  | -3.81(-6.72 to -0.89)  | 0.0107 | -0.25(-0.43 to -0.06) |
|                                                    | 3 months | 284,3.54(19.61)  | 274,10.74(18.44) | -6.57(-9.51 to -3.63)  | <.0001 | -0.40(-0.59 to -0.22) |
| PedsQL emotional functioning                       | 1 week   | 284,5.29(18.46)  | 274,10.86(19.51) | -6.14(-9.36 to -2.91)  | 0.0002 | -0.34(-0.51 to -0.16) |
|                                                    | 3 months | 284,9.52(19.36)  | 274,16.04(20.96) | -7.08(-10.33 to -3.84) | <.0001 | -0.40(-0.59 to -0.22) |
| PedsQL social functioning                          | 1 week   | 284,3.56(21.40)  | 274,10.89(20.76) | -6.13(-9.33 to -2.92)  | 0.0002 | -0.36(-0.54 to -0.17) |
|                                                    | 3 months | 284,6.25(22.01)  | 274,13.83(19.71) | -6.37(-9.59 to -3.14)  | 0.0001 | -0.41(-0.62 to -0.20) |
| PedsQL school functioning                          | 1 week   | 284,5.42(17.48)  | 274,7.90(17.63)  | -3.44(-6.04 to -0.84)  | 0.0096 | -0.20(-0.36 to -0.05) |
|                                                    | 3 months | 284,7.50(17.13)  | 274,13.67(16.44) | -7.52(-10.15 to -4.90) | <.0001 | -0.48(-0.65 to -0.31) |
| PedsQL psychosocial health                         | 1 week   | 284,4.87(14.76)  | 274,9.91(14.73)  | -5.48(-8.08 to -2.87)  | <.0001 | -0.37(-0.55 to -0.19) |
|                                                    | 3 months | 284,7.87(14.53)  | 274,14.58(14.64) | -7.26(-9.88 to -4.64)  | <.0001 | -0.54(-0.74 to -0.35) |
| PedsQL Physical Functioning Subscale Score         | 1 week   | 284,4.89(15.71)  | 274,4.98(15.17)  | 0.16(-1.40 to 1.73)    | 0.8364 | 0.02(-0.15 to 0.19)   |
|                                                    | 3 months | 284,4.07(16.54)  | 274,5.46(14.87)  | -1.27(-2.85 to 0.31)   | 0.1141 | -0.15(-0.33 to 0.04)  |

Effectiveness of a group psychological intervention to reduce psychosocial distress in adolescents in Pakistan: A single-blind, cluster Randomized Controlled Trial

|                                              |          |                  |                    |                       |        |                       |
|----------------------------------------------|----------|------------------|--------------------|-----------------------|--------|-----------------------|
| PedsQL Emotional Functioning Subscale Score  | 1 week   | 284,4.65(18.09)  | 274,8.31(18.72)    | -0.98(-3.54 to 1.58)  | 0.4534 | -0.08(-0.28 to 0.12)  |
|                                              | 3 months | 284,4.36(19.90)  | 274,9.14(17.50)    | -2.10(-4.69 to 0.48)  | 0.1098 | -0.17(-0.38 to 0.04)  |
| PedsQL Social Functioning Subscale Score     | 1 week   | 284,3.15(12.00)  | 274,3.22(11.17)    | -0.17(-1.05 to 0.70)  | 0.6957 | -0.03(-0.20 to 0.13)  |
|                                              | 3 months | 284,3.11(13.20)  | 274,3.27(12.31)    | -0.21(-1.09 to 0.68)  | 0.6448 | -0.04(-0.21 to 0.13)  |
| PSYCHLOPS-Kids                               | 1 week   | 284, -0.92(3.71) | 274, -2.34(4.20)   | 1.89(1.19 to 2.60)    | <.0001 | 0.48(0.30 to 0.66)    |
|                                              | 3 months | 284, -0.96(3.86) | 274, -2.87(3.96)   | 2.41(1.69 to 3.12)    | <.0001 | 0.64(0.45 to 0.83)    |
| APQ involvement                              | 1 week   | 284,4.73(12.77)  | 274,2.18(12.66)    | -2.52(-5.35 to 0.31)  | 0.0808 | -0.19(-0.41 to 0.02)  |
|                                              | 3 months | 284,9.07(12.42)  | 274,6.64(12.94)    | -2.91(-5.75 to -0.07) | 0.0443 | -0.21(-0.41 to -0.01) |
| APQ positive parenting                       | 1 week   | 284,0.28(4.81)   | 274,1.36(4.86)     | -1.33(-2.24 to -0.42) | 0.0043 | -0.29(-0.48 to -0.09) |
|                                              | 3 months | 284,0.92(4.85)   | 274,1.26(5.08)     | -0.57(-1.49 to 0.34)  | 0.2186 | -0.13(-0.33 to 0.07)  |
| APQ poor supervision                         | 1 week   | 284, -1.70(5.45) | 274, -1.63(5.56)   | -0.15(-1.10 to 0.80)  | 0.7495 | -0.03(-0.22 to 0.16)  |
|                                              | 3 months | 284, -3.07(5.98) | 274, -3.49(5.89)   | 0.38(-0.58 to 1.34)   | 0.4345 | 0.06(-0.10 to 0.23)   |
| APQ inconsistent discipline                  | 1 week   | 284,0.73(4.19)   | 274,0.42(4.17)     | 0.44(-0.14 to 1.02)   | 0.1339 | 0.13(-0.04 to 0.30)   |
|                                              | 3 months | 284,1.19(4.35)   | 274,0.29(4.34)     | 1.07(0.48 to 1.65)    | 0.0004 | 0.32(0.14 to 0.50)    |
| APQ corporal punishment                      | 1 week   | 284, -0.63(2.36) | 274, -0.74(2.45)   | -0.02(-0.46 to 0.41)  | 0.9273 | -0.01(-0.25 to 0.23)  |
|                                              | 3 months | 284,1.64(3.09)   | 274,1.41(3.13)     | 0.12(-0.32 to 0.56)   | 0.6013 | 0.04(-0.12 to 0.21)   |
| <b>Caregiver reported secondary outcomes</b> |          |                  |                    |                       |        |                       |
| PedsQL – family impact                       | 1 week   | 284,3.90(13.27)  | 274,5.45(12.39)    | -0.26(-1.31 to 0.78)  | 0.6213 | -0.04(-0.19 to 0.12)  |
|                                              | 3 months | 284,4.38(13.14)  | 274,5.56(12.59)    | -0.82(-1.88 to 0.24)  | 0.1289 | -0.14(-0.33 to 0.04)  |
| APQ involvement (Caregiver)                  | 1 week   | 284,3.44(7.69)   | 274,6.15(6.71)     | -2.71(-4.04 to -1.38) | <.0001 | -0.37(-0.56 to -0.19) |
|                                              | 3 months | 284,3.79(7.99)   | 274,6.03(7.02)     | -2.22(-3.56 to -0.88) | 0.0012 | -0.31(-0.50 to -0.12) |
| APQ positive parenting (Caregiver)           | 1 week   | 284,1.32(5.41)   | 274,2.23(4.78)     | -1.10(-2.20 to -0.01) | 0.0488 | -0.24(-0.47 to -0.00) |
|                                              | 3 months | 284,1.37(5.37)   | 274,1.95(4.52)     | -0.77(-1.88 to 0.33)  | 0.1686 | -0.16(-0.39 to 0.07)  |
| APQ poor supervision (Caregiver)             | 1 week   | 284, -0.15(3.77) | 274, -2.16(4.43)   | 0.99(0.10 to 1.88)    | 0.0300 | 0.28(0.03 to 0.54)    |
|                                              | 3 months | 284, -1.25(3.92) | 274, -2.71(4.52)   | 0.43(-0.46 to 1.33)   | 0.3428 | 0.13(-0.13 to 0.39)   |
| APQ inconsistent discipline (Caregiver)      | 1 week   | 284,1.12(4.98)   | 274, -7.17(127.09) | 0.21(-0.66 to 1.08)   | 0.6382 | 0.06(-0.18 to 0.29)   |
|                                              | 3 months | 284,1.13(4.73)   | 274, -6.81(127.17) | -0.14(-1.02 to 0.73)  | 0.7461 | -0.04(-0.28 to 0.20)  |

Effectiveness of a group psychological intervention to reduce psychosocial distress in adolescents in Pakistan: A single-blind, cluster Randomized Controlled Trial

|                                     |          |                |                  |                     |        |                     |
|-------------------------------------|----------|----------------|------------------|---------------------|--------|---------------------|
| APQ corporal punishment (Caregiver) | 1 week   | 284,0.02(2.59) | 274, -0.49(3.06) | 0.10(-0.35 to 0.55) | 0.6649 | 0.04(-0.14 to 0.22) |
|                                     | 3 months | 284,0.12(2.68) | 274, -0.39(2.92) | 0.12(-0.34 to 0.57) | 0.6125 | 0.05(-0.14 to 0.24) |

PSC=Pediatric Symptoms Checklist (PSC). RCADS=Revised Children Anxiety and Depression Scale. \*\*= subscales of Social Problem-Solving Inventory - Revised Short Form. PEPS= Perceived Emotional/Personal Support Scale. PHQ-A=Patient Health Questionnaire – Adolescent version. SWEMWS= Short Warwick Edinburgh Mental Wellbeing Scale. PedsQL=Pediatric Quality of Life. PSYCHLOPS-Kids= Psychological Outcome Profile-Kids version. APQ=Alabama Parenting Questionnaire (APQ).
